# Supplementary material for: Paediatric critical illness associated with respiratory infection: a single-centre, retrospective cohort study
Source: PubMed Central journal article supplement — BMJ Paediatr Open. 2020 Apr 27;4(1):e000640. doi: 10.1136/bmjpo-2020-000640 (PMC7213883; doi:10.1136/bmjpo-2020-000640), 2020-04-27
Supplement: bmjpo-2020-000640.draft_revisions.pdf [file bmjpo-2020-000640.draft_revisions.pdf]

# BMJ Paediatrics Open

BMJ Paediatrics Open is committed to open peer review. As part of this commitment we make the peer review history of every article we publish publicly available.

When an article is published we post the peer reviewers' comments and the authors' responses online. We also post the versions of the paper that were used during peer review. These are the versions that the peer review comments apply to.

The versions of the paper that follow are the versions that were submitted during the peer review process. They are not the versions of record or the final published versions. They should not be cited or distributed as the published version of this manuscript.

BMJ Paediatrics Open is an open access journal and the full, final, typeset and author-corrected version of record of the manuscript is available on our site with no access controls, subscription charges or pay-per-view fees (<http://bmjpaedsopen.bmj.com>).

If you have any questions on BMJ Paediatrics Open's open peer review process please email [info.bmjpo@bmj.com](mailto:info.bmjpo@bmj.com)

# BMJ Paediatrics Open

## **Pediatric critical respiratory illness associated with *Mycoplasma pneumoniae*: a single-centre, retrospective, cohort study**

|                               |                                                                                                                                                                                                                                                                                                                                                                                                                                                          |
|-------------------------------|----------------------------------------------------------------------------------------------------------------------------------------------------------------------------------------------------------------------------------------------------------------------------------------------------------------------------------------------------------------------------------------------------------------------------------------------------------|
| Journal:                      | <i>BMJ Paediatrics Open</i>                                                                                                                                                                                                                                                                                                                                                                                                                              |
| Manuscript ID                 | bmjpo-2020-000640                                                                                                                                                                                                                                                                                                                                                                                                                                        |
| Article Type:                 | Original research                                                                                                                                                                                                                                                                                                                                                                                                                                        |
| Date Submitted by the Author: | 13-Jan-2020                                                                                                                                                                                                                                                                                                                                                                                                                                              |
| Complete List of Authors:     | Alfaraidi, Haifa; McMaster University, Department of Pediatrics<br>Luinstra, Kathy; Saint Joseph's Healthcare Hamilton Charlton Campus,<br>Laboratory Medicine<br>Eshaghi, Alireza; Public Health Ontario Laboratory Services<br>Smieja, Marek; McMaster University, Department of Pathology and<br>Molecular Medicine<br>Gubbay, Jonathan; Public Health Ontario Laboratory Services<br>Pernica, Jeffrey; McMaster University, Department of Pediatrics |
| Keywords:                     | Infectious Diseases, Epidemiology                                                                                                                                                                                                                                                                                                                                                                                                                        |
|                               |                                                                                                                                                                                                                                                                                                                                                                                                                                                          |

SCHOLARONE™  
Manuscripts

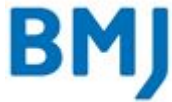

I, the Submitting Author has the right to grant and does grant on behalf of all authors of the Work (as defined in the below author licence), an exclusive licence and/or a non-exclusive licence for contributions from authors who are: i) UK Crown employees; ii) where BMJ has agreed a CC-BY licence shall apply, and/or iii) in accordance with the terms applicable for US Federal Government officers or employees acting as part of their official duties; on a worldwide, perpetual, irrevocable, royalty-free basis to BMJ Publishing Group Ltd ("BMJ") its licensees and where the relevant Journal is co-owned by BMJ to the co-owners of the Journal, to publish the Work in this journal and any other BMJ products and to exploit all rights, as set out in our [licence](#).

The Submitting Author accepts and understands that any supply made under these terms is made by BMJ to the Submitting Author unless you are acting as an employee on behalf of your employer or a postgraduate student of an affiliated institution which is paying any applicable article publishing charge ("APC") for Open Access articles. Where the Submitting Author wishes to make the Work available on an Open Access basis (and intends to pay the relevant APC), the terms of reuse of such Open Access shall be governed by a Creative Commons licence – details of these licences and which [Creative Commons](#) licence will apply to this Work are set out in our licence referred to above.

Other than as permitted in any relevant BMJ Author's Self Archiving Policies, I confirm this Work has not been accepted for publication elsewhere, is not being considered for publication elsewhere and does not duplicate material already published. I confirm all authors consent to publication of this Work and authorise the granting of this licence.

1  
2  
3 **Pediatric critical respiratory illness associated with *Mycoplasma pneumoniae*: a single-**  
4 **centre, retrospective, cohort study**  
5  
6

7 Haifa Alfaraidi, MBBS, Department of Pediatrics, McMaster University, Hamilton, Ontario,  
8 Canada  
9

10 Kathy Luinstra, Department of Laboratory Medicine, St. Joseph's Healthcare Hamilton, Ontario,  
11 Canada  
12

13  
14 AliReza Eshaghi, PhD. Public Health Ontario Laboratory, Public Health Ontario, Toronto,  
15 Ontario, Canada.  
16

17  
18 Marek Smieja, MD PhD, Department of Pathology and Molecular Medicine, McMaster  
19 University  
20

21  
22 Jonathan B. Gubbay, MBBS, Public Health Ontario Laboratory, Public Health Ontario, Toronto,  
23 Ontario, Canada. Department of Laboratory Medicine and Pathobiology and Department of  
24 Pediatrics, University of Toronto, Toronto, Ontario, Canada.  
25

26  
27 Jeffrey M. Pernica, MD, Division of Infectious Disease, Department of Pediatrics, McMaster  
28 University  
29

30 Corresponding author:

31 Jeffrey M. Pernica, 1280 Main St. West, Hamilton, ON, Canada, L8S 4K1

32 p: (905) 521 2100 extension 76185

33 f: (905) 308 7548

34 email: [pernica@mcmaster.ca](mailto:pernica@mcmaster.ca)  
35  
36

37 Word count : 2493  
38  
39

40 Keywords: pneumonia, intensive care, respiratory tract infection, epidemiology, atypical  
41

42 Short title: Pediatric critical respiratory illness associated with *Mycoplasma pneumoniae*  
43  
44

45 Funding: This project was supported by a McMaster University Department of Pediatrics  
46 Resident Research Grant. JMP was supported by a Hamilton Health Sciences Early Career  
47 Award. There are no conflicts of interest.  
48

49 Presentation: Poster presentation, Association of Medical Microbiology and Infectious Disease  
50 Canada annual conference, 2018.  
51  
52

53 Acknowledgements: The authors would like to acknowledge the assistance of Samir Patel who  
54 oversaw the Mycoplasma resistance testing.  
55  
56  
57  
58  
59  
60

## Abstract

**Objectives.** To measure the prevalence of *Mycoplasma pneumoniae* infection in critically ill children with respiratory infections and to determine if children in whom *M. pneumoniae* is detected differ systematically from those that are not.

**Study design.** A retrospective, single-centre, cohort study. All children aged 2 months – 18 years with presumed respiratory infection who were admitted to the McMaster Children's Hospital pediatric intensive care unit between September 2015-October 2016 were eligible. Participants were grouped by clinical syndrome (viral respiratory infection, asthma exacerbation, undifferentiated/uncomplicated pneumonia, pneumonia complicated by effusion/empyema, and 'other'). Testing for *M. pneumoniae* from nasopharyngeal specimens was done using a lab-developed PCR assay.

**Results.** There were 227 participants; the median age was 3.1 y, 43% were female, and 79% had medical comorbidities. Those with any pneumonia were significantly less likely to have a respiratory virus identified in their NPS and had significantly higher C-reactive protein values than those in the viral infection and asthma groups. There were 10 participants in whom *M. pneumoniae* was detected (4.4%, 95%CI 2.1-8.0%). *Mycoplasma*-positive children were older (difference 3.5 y, 95%CI 0.54 – 6.4 y) and had fewer viral co-infections (30% compared to 68%,  $p=0.02$ ). The prevalence of *Mycoplasma* infection in children aged > 5 y with any pneumonia was 12.5% (95%CI 4-27%).

**Conclusions.** *M. pneumoniae* infection was not rare in a cohort of children admitted to the PICU with critical respiratory infection. Rapid diagnostic testing and targeted treatment should be considered in an effort to avert morbidity and mortality from respiratory infection.

### What is known about this topic?

*Mycoplasma pneumoniae* is commonly detected in children with non-severe pneumonia.

Guidelines for the management of community-acquired pneumonia in children do not advocate empiric treatment with antibiotics active against *Mycoplasma* nor routine testing for this pathogen.

### What this study adds:

*Mycoplasma pneumoniae* was detected in 12.5% of school-aged children with critically severe community-acquired pneumonia.

Systematic screening of school-aged children with pneumonia in the intensive care unit should be considered.

## BACKGROUND

Community-acquired pneumonia (CAP) is a leading cause of pediatric hospitalization in North America (1). Children with respiratory disease severe enough to warrant admission to a paediatric intensive care unit (PICU) represent a minority of pneumonia-related hospitalizations (2) but infection-related morbidity and mortality is higher in this subgroup (3).

*Streptococcus pneumoniae* has long been considered the most important bacterial pathogen causing severe CAP (4,5). *Mycoplasma pneumoniae*, in contrast, is thought of as a less virulent pathogen, possibly due to how often *M. pneumoniae* infection self-resolves (6). Neither the American, Canadian, nor British guidelines recommend antimicrobials with activity against *M. pneumoniae* as first-line empiric treatment for pediatric CAP (7-9). However, this pathogen is a common cause of CAP, especially in school-aged children; *M. pneumoniae* was the most commonly identified bacterial pathogen in American children hospitalized with CAP, being detected in 8% of the overall cohort and in an astonishing 19% of school-aged children (2). A subsequent analysis of this data demonstrated that the children with *M. pneumoniae* infection could not be distinguished reliably on a clinical basis from those without and that, in contrast to dogma (8,9), single lobar infiltrates and pleural effusions were common on chest radiography (32% and 26% of those infected, respectively) (10). Furthermore, 12% of those with *M. pneumoniae* infection required intensive care (10). Clearly, the epidemiology of this common respiratory pathogen – and its effect on the clinical course and prognosis for children with severe CAP – should be evaluated further. The objective of our study was to describe children

1  
2  
3 admitted to the PICU of McMaster Children's Hospital (MCH) with respiratory infection and  
4  
5 explore the epidemiology of *M. pneumoniae* infection in this population.  
6  
7  
8  
9

## 10 **METHODS**

### 11 **Design**

12  
13  
14  
15  
16  
17 A single center, retrospective cohort study. Eligible children were those aged 2 months to 18  
18 years admitted to the MCH PICU from September 2015 to October 2016 with a presumptive  
19  
20 respiratory infection, as defined by a discharge diagnosis of any lower respiratory tract  
21  
22 infection; we attempted to capture all those with possible infection, to minimize bias. Children  
23  
24 aged less than two months were not included due to the very different epidemiology of  
25  
26 respiratory infection in that age group. Furthermore, all eligible participants must have had a  
27  
28 nasopharyngeal swab (NPS) taken and a respiratory symptom or sign, including at least one of  
29  
30 the following: 1) tachypnoea as per age-specific norms (35); 2) cough; 3) increased work of  
31  
32 breathing on exam, or 4) auscultatory findings such as crackles, wheeze, or rhonchi. The study  
33  
34 was approved by the Hamilton Integrated Research Ethics Board. Patients or the public were  
35  
36 not involved in study design. No formal sample size calculation was done.  
37  
38  
39  
40  
41  
42  
43  
44  
45  
46

### 47 **Data collection**

48  
49 Information was obtained by retrospective chart review using a standardized data collection  
50  
51 form. To group study participants by infection syndrome, the diagnoses of the clinical team  
52  
53 were categorized as follows: viral infection without pneumonia (including bronchiolitis and  
54  
55  
56  
57  
58  
59  
60

1  
2  
3 croup), undifferentiated/uncomplicated pneumonia, pneumonia complicated by  
4  
5 effusion/empyema, asthma, and 'other.' If the clinical team recorded multiple diagnoses from  
6  
7 the list above, they were classified using the following rules:  
8  
9

- 10 1. Participants marked as having both viral infection and pneumonia were classified as  
11 having 'pneumonia' if the chest radiograph was read by the radiologist as consistent  
12 with pneumonia and as 'viral infection' (without pneumonia) if not.  
13  
14
- 15 2. Participants marked as having both asthma and pneumonia were classified as having  
16 'pneumonia' if the chest radiograph was read by the radiologist as consistent with  
17 pneumonia and as 'asthma' if not.  
18  
19
- 20 3. Participants marked as having both viral infection and asthma were classified as having  
21 'asthma' if they were older than 1 y of age and had a history of atopy; if not, they were  
22 classified as 'viral infection.'  
23  
24  
25  
26  
27  
28  
29  
30  
31  
32  
33  
34

### 35 **Laboratory testing**

36  
37 All children hospitalized with a potentially infectious respiratory illness at MCH have an NPS  
38 performed routinely to identify respiratory viruses. NPSs are assayed using a lab-developed  
39 multiplex respiratory virus panel that detects RSV A/B, human metapneumovirus, influenza  
40 A/B, parainfluenza I-III, adenovirus, and rhinovirus/enterovirus. NPS specimens from eligible  
41 participants were identified and stored. After the surveillance period, NPSs from participants  
42 were batch-tested (ie. test results were not available to treating clinicians) using an HRLMP lab-  
43 developed multiplex PCR assay to detect *M. pneumoniae* and *Chlamydia pneumoniae*.  
44  
45  
46  
47  
48  
49  
50  
51  
52  
53  
54  
55  
56  
57  
58  
59  
60



1  
2  
3 Any MP testing ordered prospectively by treating clinicians in the course of routine care was  
4  
5 not processed using the lab-developed PCR assay but at Public Health Ontario Laboratories  
6  
7 using a commercial multiplex real-time assay (ProPneumo-1 Assay; Gen-Probe Inc., San Diego,  
8  
9 CA, USA), which also tests for *Chlamydia pneumoniae*. Samples that tested positive for MP  
10  
11 underwent further testing at Public Health Ontario laboratories; nested PCR amplification and  
12  
13 DNA sequencing of domain V of the partial 23S rRNA gene were performed to detect mutations  
14  
15 at nucleotide positions 2063 and 2064, which are associated with macrolide resistance (11,12).  
16  
17  
18  
19  
20  
21  
22

23 'Confirmed invasive bacterial infections' were defined as those children with a sterile-site  
24  
25 culture (eg. blood, pleural fluid) positive for a pathogen (eg. *S. pneumoniae*, *S. pyogenes*, *S.*  
26  
27 *aureus*). Cultures positive for coagulase-negative staphylococci were categorized as  
28  
29 contaminants.  
30  
31  
32  
33  
34

### 35 **Statistical analysis**

36  
37 Descriptive statistics to describe the baseline characteristics were reported as count (percent)  
38  
39 for categorical variables, and mean (standard deviation) or median (first quartile-third quartile,  
40  
41 labeled as interquartile range [IQR]) for continuous variables depending on the distribution.  
42  
43 Linear regression or ANOVA was used to compare normally-distributed continuous variables  
44  
45 and Kruskal-Wallis testing was used when the distribution of the variable differed greatly from  
46  
47 the normal distribution. Chi-square or Fisher exact testing was used to compare categorical  
48  
49 variables between groups. No imputation of missing data was done.  
50  
51  
52  
53  
54

## 55 **RESULTS**

1  
2  
3 In the study period there were 740 children admitted to the PICU; of these, 227 participants  
4  
5 (31%) had a diagnosis of acute respiratory illness, an NPS, and at least one respiratory tract  
6  
7 symptom or sign (Table 1). The median age was 3.1 y (IQR 1.4-6.2 y) and 43% were female. The  
8  
9 majority of participants (79%) had comorbidities, with 58 (26%) having a neurodevelopmental  
10  
11 problem or difficulty handling secretions, 28 (12%) having a cardiac problem, 89 (39%) having  
12  
13 atopic disease/asthma, 24 (11%) having another pulmonary issue, 28 (12%) having a genetic  
14  
15 disorder, and 21 (9%) being ex-premature infants. There were 13 participants (6%) that had a  
16  
17 tracheostomy, 7 (3%) that were receiving home ventilation, 6 (3%) that were receiving home  
18  
19 non-invasive ventilation, and 9 (4%) on home oxygen therapy. There were three deaths (1.3%)  
20  
21 in the cohort and all had comorbidities. Sixteen participants (7%) were not up-to-date with  
22  
23 DPTaP-Hib or PCV13 vaccine and 26 (11%) had not received the influenza vaccine.  
24  
25  
26  
27  
28  
29  
30  
31

32 In the PICU, the majority of participants (n=143, 63%) received high-flow oxygen support, 52  
33  
34 (29%) received CPAP/BiPAP, 41 (18%) required conventional mechanical ventilation, and 3  
35  
36 (1.3%) were treated with high-frequency oscillatory ventilation. Viral detections were common,  
37  
38 with 80 (35%) participants positive for rhinovirus/enterovirus, 38 (17%) positive for RSV, and 24  
39  
40 (11%) positive for parainfluenza; only 76 (33%) tested negative for respiratory viruses. There  
41  
42 were 8 participants with confirmed invasive bacterial infections. The median length of stay in  
43  
44 the PICU was 3 days (IQR 2-5 d) and the medial length of stay in-hospital was 4 days (IQR 3-10  
45  
46  
47  
48  
49  
50  
51  
52  
53  
54  
55  
56  
57  
58  
59  
60 d).

1  
2  
3 Of the 227 participants, 51 (22%) were categorized as having had viral infection without  
4 pneumonia, 82 (36%) as uncomplicated pneumonia, 13 (5.8%) as pneumonia complicated by  
5 effusion/empyema, 63 (27%) as an asthma exacerbation, and 18 (7.9%) as 'other.' There was  
6 considerable overlap in the white blood cell (WBC) distributions between categories. C-reactive  
7 protein measurements were clearly different between groups; those with pneumonia (median  
8 45.5 mg/L) had significantly higher median CRP values than those in the viral infection (median  
9 12.6 mg/L) and asthma (median 7.0 mg/L) groups, whereas those with pneumonia complicated  
10 by effusion/empyema (median CRP 222.3 mg/L) had significantly higher CRP values than all  
11 other groups (Table 2). There were clear differences in the proportions of participants in each  
12 group with respect to viral NPS testing; 90% of the viral infection group and 71% of the asthma  
13 group had a respiratory virus detected, while only 60% of the uncomplicated pneumonia group  
14 and 23% of the complicated pneumonia group did ( $p < 0.001$ ). All of the participants in the  
15 uncomplicated and complicated pneumonia groups were treated with antibiotics, compared to  
16 94% of the 'other' group, 73% of the viral-infection group, and 35% of the asthma group  
17 ( $p < 0.0001$ ). The duration of antibacterial treatment was also significantly shorter in the viral  
18 infection and asthma groups than all other groups ( $p < 0.0001$ ), as well as significantly longer in  
19 the complicated pneumonia group than in the uncomplicated pneumonia group ( $p = 0.02$ ).

20  
21  
22  
23  
24  
25  
26  
27  
28  
29  
30  
31  
32  
33  
34  
35  
36  
37  
38  
39  
40  
41  
42  
43  
44  
45  
46  
47 There were 3 participants who tested positive, of 10 who had specimens tested, for *M.*  
48  
49  
50  
51  
52  
53  
54  
55  
56  
57  
58  
59  
60  
*pneumoniae* through testing that was ordered prospectively by clinicians in the course of  
routine care (one sputum, one NPS, and one bronchoalveolar lavage [BAL]). There were an  
additional 7 participants that were found to have an NPS positive for *M. pneumoniae* via

1  
2  
3 retrospective study testing. The overall prevalence of *M. pneumoniae*-associated respiratory  
4  
5 illness in the study cohort was therefore 10/227 (4.4%, 95%CI 2.1-8.0%). *Mycoplasma*-positive  
6  
7 participants were significantly older than *Mycoplasma*-negative children (difference 3.5 y, 95%  
8  
9 CI 0.54-6.4 y,  $p=0.02$ )(Table 3). The overall prevalence of *Mycoplasma* infection in participants  
10  
11 aged > 5 years with any type of pneumonia was 12.5% (4 of 34 in the uncomplicated  
12  
13 pneumonia group and 1 of 6 in the complicated pneumonia group, 95% CI 4-27%). In this older  
14  
15 subset, there were zero *Mycoplasma*-positive participants in the viral infection or asthma  
16  
17 groups.  
18  
19  
20  
21  
22  
23  
24

25 None of the *Mycoplasma*-positive group had invasive bacterial infections. Three (30%) of the  
26  
27 *Mycoplasma*-positive group had a respiratory viral pathogen detected as compared to 148  
28  
29 (68%) of the *Mycoplasma*-negative group ( $p=0.02$ ). Antimicrobials were prescribed for  
30  
31 significantly longer from the time of admission in the *Mycoplasma*-positives (median 11 days,  
32  
33 IQR 7-17 d) as compared to the *Mycoplasma*-negatives (median 5 d, IQR 0-8 d,  $p=0.02$ ); this  
34  
35 difference remained significant when the analysis was restricted to only those participants with  
36  
37 uncomplicated pneumonia (median 12 d as compared to median 7 d,  $p=0.004$ ).  
38  
39  
40  
41  
42  
43  
44

45 Of the 10 *Mycoplasma* isolates, 5 were macrolide-sensitive and 1 harboured the G2063  
46  
47 mutation in the 23S rRNA gene (overall prevalence 17%, 95%CI 0.4-64%); 3 isolates were low-  
48  
49 level positives, and so could not be sequenced. One isolate was not retained. Only half of the  
50  
51 participants with *Mycoplasma* infection were prescribed macrolide or fluoroquinolone  
52  
53 antibacterials.  
54  
55  
56  
57  
58  
59  
60

No study participants had *Chlamydia pneumoniae* detected in their NPS.

## DISCUSSION

In this retrospective single-centre study, we found that 4% of all children with acute respiratory illness admitted to the PICU, the majority of whom had comorbidities, had *M. pneumoniae* detected in respiratory specimens. More importantly, 12.5% (95%CI 4-27%) of children diagnosed with pneumonia who were at least 5 years of age were positive for *M. pneumoniae*. Children that were *Mycoplasma*-positive were older, had fewer respiratory virus co-infections, were more often treated with antibacterials before admission, and received a longer course of antibacterials in-hospital than *Mycoplasma*-negative children. Half of the *Mycoplasma*-positive children did not receive antibacterials active against *Mycoplasma*. One of the six *Mycoplasma* isolates that could be sequenced harboured a macrolide resistance gene.

The fact that *Mycoplasma* was commonly detected in critically ill children would argue that routine surveillance for this pathogen should be considered, as others have suggested (13). Our results are consistent with the findings of the EPIC study, which also demonstrated that *M. pneumoniae* is found commonly in school-aged children with CAP (2), including children admitted to the intensive care unit (10). A recent retrospective cohort study of all children admitted to two PICUs in Australia over a 6-year period revealed 30 cases identified by testing done as part of routine clinical care among 3005 “nonelective infection-related admissions”, for a prevalence of ~1% (14). Those authors stated “*M. pneumoniae* infections in critically ill

1  
2  
3 children are uncommon” and noted that outcomes were comparable to those children without  
4  
5 *Mycoplasma* detected. However, there is considerable variability in what constitutes an  
6  
7  
8 “infection-related admission” (14); furthermore, given the range of presenting symptoms/signs  
9  
10 associated with this pathogen (10,15,16), one questions whether these clinicians would have  
11  
12 been able to reliably identify which children merited testing, and so the true prevalence of  
13  
14 *Mycoplasma* infection in this cohort could be much higher. The incidence of *M. pneumoniae*  
15  
16 infection does vary widely by location and season (10,17) and so we cannot exclude the  
17  
18 possibility that the prevalence observed in our study was higher than in years before or after.  
19  
20  
21  
22  
23  
24

25 An older iteration of the Canadian Paediatric Society guidelines for the management of CAP  
26  
27 (circa 2011) recommended routine use of azithromycin for all children with ‘severe’ pneumonia  
28  
29 because of the possibility of ‘atypical infection’, though diagnostic testing to identify atypical  
30  
31 pathogens was not suggested or even mentioned (18). At that time, we thought that this  
32  
33 practice would not represent appropriate antimicrobial stewardship, given that the majority of  
34  
35 severe pediatric CAP is likely to be caused by *S. pneumoniae*. The CPS guidelines were later  
36  
37 revised in 2015 and no longer recommend routine treatment with macrolides (8). They state  
38  
39 that atypical pneumonia should be suspected in children with ‘subacute, nonsevere  
40  
41 pneumonia, presenting with features such as prominent cough, minimal leukocytosis, and a  
42  
43 nonlobar infiltrate’ and that azithromycin is recommended ‘for suspected or proven  
44  
45 *Mycoplasma* or *Chlamydia pneumoniae*’ (8). Unfortunately, it has been repeatedly  
46  
47 demonstrated that these symptoms and signs cannot reliably identify atypical pneumonia  
48  
49 (10,15,16); it seems likely that many clinicians may not consider the possibility that *M.*  
50  
51  
52  
53  
54  
55  
56  
57  
58  
59  
60

1  
2  
3 *pneumoniae* may play a significant role in the pathogenesis of critically ill children with  
4  
5 respiratory compromise. Based on our data, we would suggest that clinicians be aware that a  
6  
7 reasonable proportion of school-aged children with CAP admitted to the PICU may have an  
8  
9 active *M. pneumoniae* infection and recommend empiric treatment with anti-*Mycoplasma*  
10  
11 agents (eg. macrolides, doxycycline, fluoroquinolones) until diagnostic (molecular) testing  
12  
13 results are available.  
14  
15  
16  
17  
18  
19

20 One obvious issue is that we cannot be certain of the therapeutic benefit of antibacterials (such  
21  
22 as macrolides or doxycycline) for pediatric CAP presumed to be caused at least in part by *M.*  
23  
24 *pneumoniae*. (We suspect that almost all clinicians would treat suspected or presumed  
25  
26 *Legionella* CAP with antibacterials, but this pathogen is rare in pediatrics (19).) Furthermore,  
27  
28 the detection of *Mycoplasma* in the respiratory tract does not prove causation, as coinfections  
29  
30 have been shown to be common (10) and some investigators have documented high rates of  
31  
32 PCR-positivity in control persons (20) (although others have not (10,21)). We would agree with  
33  
34 other authors who have suggested that specific anti-*Mycoplasma* treatment might yield  
35  
36 significant benefit, especially for those with severe disease, and have called for the execution of  
37  
38 a randomized treatment trial (10,13). However, until results of a definitive treatment trial are  
39  
40 available, we feel that the potential benefit of treating critically ill children with *Mycoplasma*  
41  
42 detected in respiratory symptoms outweighs the potential antimicrobial stewardship harms of  
43  
44 this strategy.  
45  
46  
47  
48  
49  
50  
51  
52  
53  
54  
55  
56  
57  
58  
59  
60

1  
2  
3 In conclusion, we found that *Mycoplasma pneumoniae* was detected in 12.5% of children aged  
4  
5 5 years and older admitted with CAP to the PICU of a children's hospital over a 13-month  
6  
7 period. Consideration should be given to empiric anti-*Mycoplasma* antimicrobial therapy  
8  
9 pending the result of rapid molecular diagnostic testing in this subset of critically ill children.  
10  
11  
12  
13  
14

#### 15 Contributorship Statement

16  
17 HA designed the study, wrote the protocol, did the chart reviews, wrote the abstract, and  
18  
19 revised the manuscript critically. JMP conceived the study question, provided input on study  
20  
21 design, performed statistical analyses, and wrote the manuscript. KL and MS provided input on  
22  
23 microbiologic methods, revised the protocol, did testing to identify *M. pneumoniae*, and revised  
24  
25 the manuscript critically. AE and JBG provided input on microbiologic methods, did testing to  
26  
27 identify resistance genes, and revised the manuscript critically.  
28  
29  
30  
31  
32  
33  
34  
35  
36  
37  
38  
39  
40  
41  
42  
43  
44  
45  
46  
47  
48  
49  
50  
51  
52  
53  
54  
55  
56  
57  
58  
59  
60



## References

1. Lee GE, Lorch SA, Sheffler-Collins S, *et al.* National hospitalization trends for pediatric pneumonia and associated complications. *Pediatrics* **2010**; 126: 204-213
2. Jain S, Williams DJ, Arnold SR, *et al.* Community-acquired pneumonia requiring hospitalization among u.S. Children. *N Engl J Med* **2015**; 372: 835-845
3. Koh J, Wong JJ, Sultana R, *et al.* Risk factors for mortality in children with pneumonia admitted to the pediatric intensive care unit. *Pediatr Pulmonol* **2017**; 52: 1076-1084
4. Principi N & Esposito S. Emerging problems in the treatment of pediatric community-acquired pneumonia. *Expert Rev Respir Med* **2018**; 12: 595-603
5. Ouldali N, Levy C, Minodier P, *et al.* Long-term association of 13-valent pneumococcal conjugate vaccine implementation with rates of community-acquired pneumonia in children. *JAMA Pediatr* **2019**; 173: 362-370
6. Bradley JS, Arguedas A, Blumer JL, *et al.* Comparative study of levofloxacin in the treatment of children with community-acquired pneumonia. *Pediatr Infect Dis J* **2007**; 26: 868-878
7. Harris M, Clark J, Coote N, *et al.* British thoracic society guidelines for the management of community acquired pneumonia in children: Update 2011. *Thorax* **2011**; 66 Suppl 2: ii1-23
8. Le Saux N, Robinson JL, Canadian Paediatric Society ID, *et al.* Uncomplicated pneumonia in healthy canadian children and youth: Practice points for management. *Paediatr Child Health* **2015**; 20: 441-450
9. Bradley JS, Byington CL, Shah SS, *et al.* The management of community-acquired pneumonia in infants and children older than 3 months of age: Clinical practice guidelines by the pids and idsa. *Clin Infect Dis* **2011**; 53: e25-76
10. Kutty PK, Jain S, Taylor TH, *et al.* Mycoplasma pneumoniae among children hospitalized with community-acquired pneumonia. *Clin Infect Dis* **2019**; 68: 5-12
11. Matsuoka M, Narita M, Okazaki N, *et al.* Characterization and molecular analysis of macrolide-resistant mycoplasma pneumoniae clinical isolates obtained in japan. *Antimicrob Agents Chemother* **2004**; 48: 4624-4630
12. Eshaghi A, Memari N, Tang P, *et al.* Macrolide-resistant mycoplasma pneumoniae in humans, ontario, canada, 2010-2011. *Emerg Infect Dis* **2013**; 19
13. Shah SS. Mycoplasma pneumoniae as a cause of community-acquired pneumonia in children. *Clin Infect Dis* **2019**; 68: 13-14
14. Moynihan KM, Barlow A, Nourse C, *et al.* Severe mycoplasma pneumoniae infection in children admitted to pediatric intensive care. *Pediatr Infect Dis J* **2018**; 37: e336-e338
15. Meyer Sauter PM, Unger WWJ, van Rossum AMC, *et al.* The art and science of diagnosing mycoplasma pneumoniae infection. *Pediatr Infect Dis J* **2018**; 37: 1192-1195
16. Guo WL, Wang J, Zhu LY, *et al.* Differentiation between mycoplasma and viral community-acquired pneumonia in children with lobe or multi foci infiltration: A retrospective case study. *BMJ Open* **2015**; 5: e006766
17. Jacobs E, Ehrhardt I & Dumke R. New insights in the outbreak pattern of mycoplasma pneumoniae. *Int J Med Microbiol* **2015**; 305: 705-708

- 1  
2  
3 18. Le Saux N, Robinson JL. Pneumonia in healthy canadian children and youth: Practice  
4 points for management. *Pediatr Child Health* **2011**; 16: 417-420  
5  
6 19. Dalton STP, Wen SCH, Murdoch DR, *et al.* Searching for pediatric legionnaire disease in a  
7 population with high adult incidence. *Pediatr Infect Dis J* **2018**; 37: 960-961  
8  
9 20. Spuesens EB, Fraaij PL, Visser EG, *et al.* Carriage of mycoplasma pneumoniae in the  
10 upper respiratory tract of symptomatic and asymptomatic children: An observational  
11 study. *PLoS Med* **2013**; 10: e1001444  
12  
13 21. Nilsson AC, Bjorkman P & Persson K. Polymerase chain reaction is superior to serology  
14 for the diagnosis of acute mycoplasma pneumoniae infection and reveals a high rate of  
15 persistent infection. *BMC Microbiol* **2008**; 8: 93  
16  
17  
18  
19  
20  
21  
22  
23  
24  
25  
26  
27  
28  
29  
30  
31  
32  
33  
34  
35  
36  
37  
38  
39  
40  
41  
42  
43  
44  
45  
46  
47  
48  
49  
50  
51  
52  
53  
54  
55  
56  
57  
58  
59  
60

Table 1. Whole-cohort characteristics.

|                                                    |                        |
|----------------------------------------------------|------------------------|
| Median age (IQR)                                   | 3.14 y (1.39 – 6.15 y) |
| # Female (%)                                       | 98 (43%)               |
| Fever recorded (%)                                 | 124 (56%)              |
| Median duration of fever (IQR)                     | 3 d (2 – 6.5 d)        |
| Symptoms                                           |                        |
| Cough                                              | 195 (30%)              |
| Increased work of breathing                        | 206 (91%)              |
| Stridor                                            | 13 (5.8%)              |
| Wheeze                                             | 112 (50%)              |
| Chest pain                                         | 4 (1.8%)               |
| Antibiotics given before presentation?             |                        |
| Yes                                                | 45 (20%)               |
| Amoxicillin                                        | 18                     |
| Amoxicillin/clavulanate                            | 2                      |
| Cephalosporins                                     | 11                     |
| Macrolides                                         | 10                     |
| Other                                              | 11                     |
| Comorbid medical conditions                        | 179 (79%)              |
| neurologic/neurodevelopmental                      | 58                     |
| tracheostomy                                       | 13                     |
| prematurity                                        | 44                     |
| chronic lung disease/bronchopulmonary dysplasia    | 20                     |
| asthma                                             | 89                     |
| cystic fibrosis                                    | 1                      |
| other pulmonary disease                            | 24                     |
| genetic disease                                    | 28                     |
| cardiac disease                                    | 28                     |
| chronic liver disease                              | 1                      |
| chronic kidney disease                             | 7                      |
| endocrine disorders                                | 14                     |
| malignancy                                         | 4                      |
| immunodeficiency                                   | 3                      |
| haemoglobinopathies                                | 5                      |
| other                                              | 26                     |
| Home ventilation/oxygenation                       | 16 (7%)                |
| Mechanical ventilation                             | 7                      |
| Noninvasive ventilation                            | 6                      |
| Oxygen therapy without ventilation                 | 3                      |
| Highest level of respiratory support given in PICU |                        |
| High frequency oscillatory ventilation             | 3 (1.3%)               |
| Conventional mechanical ventilation                | 38 (17%)               |
| BiPAP/CPAP                                         | 34 (15%)               |

|                                          |           |
|------------------------------------------|-----------|
| High flow oxygen by nasal cannula        | 98 (43%)  |
| Low flow oxygen (FiO <sub>2</sub> > 0.4) | 10 (4.4%) |
| Antibiotics given in PICU                | 171 (75%) |
| ampicillin                               | 14        |
| ceftriaxone                              | 154       |
| vancomycin                               | 33        |
| clarithromycin                           | 3         |
| azithromycin                             | 37        |
| ciprofloxacin                            | 1         |
| levofloxacin                             | 11        |
| tetracyclines                            | 0         |

Table 2. Differences between diagnostic categories.

|                                            | Viral infection      | Asthma               | Pneumonia (uncomplicated/undifferentiated) | Pneumonia (complicated by effusion) | Other            |
|--------------------------------------------|----------------------|----------------------|--------------------------------------------|-------------------------------------|------------------|
| Count                                      | 51 (22%)             | 63 (27%)             | 82 (36%)                                   | 13 (5.8%)                           | 18 (7.9%)        |
| mean WBC (SD)                              | 12.2 (4.3)           | 13.6 (5.0)           | 12.9 (8.1)                                 | 17.5 (11.8)                         | 11.8 (7.3)       |
| median CRP, mg/L (IQR)                     | 12.6 (3.5-28.6)      | 7.0 (3.6-16.4)       | 45.5 <sup>1</sup> (15.2-103)               | 222.3 <sup>2</sup> (177.6-259.1)    | 25.7 (15.0-82.6) |
| No respiratory virus detected              | 5 (9.8%)             | 18 (29%)             | 33 (40%)                                   | 10 (77%)                            | 10 (56%)         |
| median duration of antibiotics, days (IQR) | 2 <sup>3</sup> (0-4) | 0 <sup>3</sup> (0-1) | 7 (7-10)                                   | 23 <sup>4</sup> (14-27)             | 10 (7-14)        |

<sup>1</sup>median of pneumonia group significantly greater than that of viral infection group (p=0.007) and asthma group (p=0.0009) but significantly lower than that of complicated pneumonia group (p=0.009)

<sup>2</sup>median of complicated pneumonia group significantly greater than viral infection and asthma groups (p<0.0001), other group (p=0.01), and pneumonia group (p=0.009)

<sup>3</sup>median of viral infection and asthma groups significantly smaller than all other groups (p<0.0001)

<sup>4</sup>median of complicated pneumonia group also significantly higher than pneumonia group (p=0.02)

Table 3. Comparison of *Mycoplasma*-positive and *Mycoplasma*-negative participants.

|                                                | <i>Mycoplasma</i> -positive | <i>Mycoplasma</i> -negative | p    |
|------------------------------------------------|-----------------------------|-----------------------------|------|
| Count                                          | 10                          | 217                         | n/a  |
| mean age, y(SD)                                | 8.1 (6.1)                   | 4.7 (4.5)                   | 0.02 |
| # with viral infection or asthma diagnosis (%) | 3 (30%)                     | 111 (51%)                   | 0.2  |

|                                                           |            |          |       |
|-----------------------------------------------------------|------------|----------|-------|
| (restricted to participants > 5 y)                        | 0          | 30 (41%) | 0.08  |
| # with no detectable respiratory virus in NPS             | 7 (70%)    | 69 (32%) | 0.02  |
| (restricted to participants > 5 y)                        | 5 (83%)    | 36 (49%) | 0.2   |
| median duration of antibiotic treatment, d (IQR)          | 11 (7-17)  | 5 (0-8)  | 0.02  |
| (restricted to participants with uncomplicated pneumonia) | 12 (10-13) | 7 (7-10) | 0.004 |
| Median length of stay in PICU, d (IQR)                    | 4.5 (2-8)  | 3 (2-5)  | 0.1   |
| (restricted to participants with uncomplicated pneumonia) | 7 (2-8)    | 4 (2-7)  | 0.7   |
| Median length of stay in hospital, d (IQR)                | 10 (5-13)  | 4 (3-9)  | 0.04  |
| (restricted to participants with uncomplicated pneumonia) | 13 (7-14)  | 7 (3-14) | 0.3   |

# BMJ Paediatrics Open

## Pediatric critical respiratory illness: a single-centre, retrospective, cohort study

|                               |                                                                                                                                                                                                                                                                                                                                                                                                                                                                                |
|-------------------------------|--------------------------------------------------------------------------------------------------------------------------------------------------------------------------------------------------------------------------------------------------------------------------------------------------------------------------------------------------------------------------------------------------------------------------------------------------------------------------------|
| Journal:                      | <i>BMJ Paediatrics Open</i>                                                                                                                                                                                                                                                                                                                                                                                                                                                    |
| Manuscript ID                 | bmjpo-2020-000640.R1                                                                                                                                                                                                                                                                                                                                                                                                                                                           |
| Article Type:                 | Original research                                                                                                                                                                                                                                                                                                                                                                                                                                                              |
| Date Submitted by the Author: | 06-Mar-2020                                                                                                                                                                                                                                                                                                                                                                                                                                                                    |
| Complete List of Authors:     | Alfaraidi, Haifa; McMaster University, Department of Pediatrics<br>Luinstra, Kathy; Saint Joseph's Healthcare Hamilton Charlton Campus, Laboratory Medicine<br>Eshaghi, Alireza; Public Health Ontario Laboratory Services<br>Smieja, Marek; McMaster University, Department of Pathology and Molecular Medicine<br>Gubbay, Jonathan; Public Health Ontario Laboratory Services<br>Pernica, Jeffrey; McMaster University, Department of Pediatrics - RINGGOLD INSTITUTION 3710 |
| Keywords:                     | Infectious Diseases, Epidemiology                                                                                                                                                                                                                                                                                                                                                                                                                                              |
|                               |                                                                                                                                                                                                                                                                                                                                                                                                                                                                                |

SCHOLARONE™  
Manuscripts



I, the Submitting Author has the right to grant and does grant on behalf of all authors of the Work (as defined in the below author licence), an exclusive licence and/or a non-exclusive licence for contributions from authors who are: i) UK Crown employees; ii) where BMJ has agreed a CC-BY licence shall apply, and/or iii) in accordance with the terms applicable for US Federal Government officers or employees acting as part of their official duties; on a worldwide, perpetual, irrevocable, royalty-free basis to BMJ Publishing Group Ltd ("BMJ") its licensees and where the relevant Journal is co-owned by BMJ to the co-owners of the Journal, to publish the Work in this journal and any other BMJ products and to exploit all rights, as set out in our [licence](#).

The Submitting Author accepts and understands that any supply made under these terms is made by BMJ to the Submitting Author unless you are acting as an employee on behalf of your employer or a postgraduate student of an affiliated institution which is paying any applicable article publishing charge ("APC") for Open Access articles. Where the Submitting Author wishes to make the Work available on an Open Access basis (and intends to pay the relevant APC), the terms of reuse of such Open Access shall be governed by a Creative Commons licence – details of these licences and which [Creative Commons](#) licence will apply to this Work are set out in our licence referred to above.

Other than as permitted in any relevant BMJ Author's Self Archiving Policies, I confirm this Work has not been accepted for publication elsewhere, is not being considered for publication elsewhere and does not duplicate material already published. I confirm all authors consent to publication of this Work and authorise the granting of this licence.

## **Pediatric critical respiratory illness: a single-centre, retrospective, cohort study**

Haifa Alfaraidi, MBBS, Department of Pediatrics, McMaster University, Hamilton, Ontario, Canada

Kathy Luinstra, Department of Laboratory Medicine, St. Joseph's Healthcare Hamilton, Ontario, Canada

AliReza Eshaghi, PhD. Public Health Ontario Laboratory, Public Health Ontario, Toronto, Ontario, Canada.

Marek Smieja, MD PhD, Department of Pathology and Molecular Medicine, McMaster University

Jonathan B. Gubbay, MBBS, Public Health Ontario Laboratory, Public Health Ontario, Toronto, Ontario, Canada. Department of Laboratory Medicine and Pathobiology and Department of Pediatrics, University of Toronto, Toronto, Ontario, Canada.

Jeffrey M. Pernica, MD, Division of Infectious Disease, Department of Pediatrics, McMaster University

Corresponding author:

Jeffrey M. Pernica, 1280 Main St. West, Hamilton, ON, Canada, L8S 4K1

p: (905) 521 2100 extension 76185

f: (905) 308 7548

email: [pernica@mcmaster.ca](mailto:pernica@mcmaster.ca)

Word count : 2777

Keywords: pneumonia, intensive care, respiratory tract infection, epidemiology, atypical

Short title: Pediatric critical respiratory illness: a retrospective study

Funding: This project was supported by a McMaster University Department of Pediatrics Resident Research Grant. JMP was supported by a Hamilton Health Sciences Early Career Award. There are no conflicts of interest.

Presentation: Poster presentation, Association of Medical Microbiology and Infectious Disease Canada annual conference, 2018.

Acknowledgements: The authors would like to acknowledge the assistance of Samir Patel who oversaw the Mycoplasma resistance testing.



## Abstract

**Objectives.** To describe children admitted with respiratory infections to a paediatric intensive care unit (PICU), classify them by infection syndrome type, and determine the prevalence of *Mycoplasma pneumoniae* infection.

**Study design.** A retrospective, single-centre, cohort study. All children aged 2 months – 18 years with presumed respiratory infection who were admitted to the McMaster Children's Hospital PICU between September 2015–October 2016 were eligible. Subjects were grouped by clinical syndrome (viral respiratory infection, asthma exacerbation, undifferentiated/uncomplicated pneumonia, pneumonia complicated by effusion/empyema, and 'other'). Testing for *M. pneumoniae* from nasopharyngeal specimens was done using a lab-developed PCR assay.

**Results.** There were 221 subjects; the median age was 3.1 y, 44% were female, and 78% had medical comorbidities. Those with any pneumonia were significantly less likely to have a respiratory virus identified in their nasopharynxes and had significantly higher C-reactive protein (CRP) values than those in the viral infection and asthma groups. There were 10 subjects in whom *M. pneumoniae* was detected (4.5%, 95%CI 2.2–8.2%). *Mycoplasma*-positive children were older (difference 3.5 y, 95%CI 0.66 – 6.4 y) and had fewer viral co-infections (30% compared to 69%,  $p=0.02$ ). The prevalence of *Mycoplasma* infection in children aged > 5 y with any pneumonia was 13.2% (95%CI 4.4–28%).

**Conclusions.** There were differences in CRP and viral prevalence observed between children with different infection syndrome types. *M. pneumoniae* infection was not rare in school-aged children with pneumonia admitted to the PICU. Rapid diagnostic testing for *Mycoplasma* and targeted treatment in older, critically ill children should be considered in an effort to avert morbidity and mortality from respiratory infection.

## What is known about this topic?

*Mycoplasma pneumoniae* is commonly detected in children with non-severe pneumonia.

Guidelines for the management of community-acquired pneumonia in children do not advocate first-line empiric treatment with antibiotics active against *Mycoplasma* nor routine testing for this pathogen.

## What this study adds:

There are clear biochemical (eg. CRP) and microbiologic (eg. respiratory virus prevalence) differences between critically ill children with different respiratory infection syndromes.

*Mycoplasma pneumoniae* was detected in 13.2% of school-aged critically ill children with severe community-acquired pneumonia.

Confidential: For Review Only

1  
2  
3  
4  
5  
6  
7  
8  
9  
10  
11  
12  
13  
14  
15  
16  
17  
18  
19  
20  
21  
22  
23  
24  
25  
26  
27  
28  
29  
30  
31  
32  
33  
34  
35  
36  
37  
38  
39  
40  
41  
42  
43  
44  
45  
46  
47  
48  
49  
50  
51  
52  
53  
54  
55  
56  
57  
58  
59  
60

## BACKGROUND

Community-acquired pneumonia (CAP) is a leading cause of pediatric hospitalization in North America (1). Children with respiratory disease severe enough to warrant admission to a paediatric intensive care unit (PICU) represent a minority (~20%) of pneumonia-related hospitalizations (2) but infection-related morbidity and mortality is higher in this subgroup (3).

*Streptococcus pneumoniae* has long been considered the most important bacterial pathogen causing severe CAP (4,5). *Mycoplasma pneumoniae*, in contrast, is thought of as a less virulent pathogen, possibly due to the fact that *M. pneumoniae* infection often self-resolves (6). Neither the American, Canadian, nor British guidelines recommend antimicrobials with activity against *M. pneumoniae* as first-line empiric treatment for pediatric CAP (7-9). However, this pathogen is a common cause of CAP, especially in school-aged children; *M. pneumoniae* was the most commonly identified bacterial pathogen in American children hospitalized with CAP, being detected in 8% of the overall cohort and in 19% of school-aged children (2). A subsequent analysis of this data demonstrated that the children with *M. pneumoniae* infection could not be distinguished reliably on a clinical basis from those without and that, in contrast to dogma (8,9), single lobar infiltrates and pleural effusions were common on chest radiography (32% and 26% of those infected, respectively) (10). Furthermore, 12% of those with *M. pneumoniae* infection required intensive care (10). Clearly, the epidemiology of this common respiratory pathogen – and its effect on the clinical course and prognosis for children with severe CAP – should be evaluated further. The objective of our study was to describe children admitted to the PICU of

1  
2  
3 McMaster Children's Hospital (MCH) with respiratory infection and determine the prevalence  
4  
5 of *M. pneumoniae* infection in this population.  
6  
7  
8  
9

## 10 **METHODS**

### 11 **Setting**

12  
13  
14  
15  
16  
17  
18 MCH is a tertiary care centre serving a population of approximately 2.3 million residents. At the  
19  
20 time of the study, the centre had 159 beds (12 PICU beds) and, on a yearly basis, admitted  
21  
22 approximately 6500 children, with over 40 000 emergency department visits.  
23  
24  
25  
26

### 27 **Design**

28  
29  
30 A single center, retrospective cohort study. Eligible children were those aged 2 months to 18  
31  
32 years admitted to the MCH PICU from September 2015 to October 2016 with a presumptive  
33  
34 respiratory infection, as defined by a discharge diagnosis of any lower respiratory tract  
35  
36 infection. Discharge diagnoses for all patients leaving the PICU were reviewed on a biweekly  
37  
38 basis by the principal investigator (HA); we attempted to capture all those with possible  
39  
40 respiratory infection, to minimize bias. Children aged less than two months were not included  
41  
42 due to the very different epidemiology of respiratory infection in that age group. Furthermore,  
43  
44 all eligible subjects must have had a nasopharyngeal swab (NPS) taken less than a week after  
45  
46 admission to hospital and a respiratory symptom or sign, including at least one of the following:  
47  
48  
49  
50  
51  
52 1) tachypnoea as per age-specific norms (35); 2) cough; 3) increased work of breathing on  
53  
54 exam, or 4) auscultatory findings such as crackles, wheeze, or rhonchi. The study was approved  
55  
56  
57  
58  
59  
60

1  
2  
3 by the Hamilton Integrated Research Ethics Board, who waived the requirement for consent in  
4  
5 this retrospective study. Patients or the public were not involved in study design. No formal  
6  
7 sample size calculation was done.  
8  
9

### 10 11 12 13 **Data collection**

14  
15 Information was obtained by retrospective chart review using a standardized data collection  
16  
17 form. To group study subjects by infection syndrome, the discharge diagnoses of the clinical  
18  
19 team were categorized as follows: viral infection without pneumonia (including bronchiolitis  
20  
21 and croup), undifferentiated/uncomplicated pneumonia, pneumonia complicated by  
22  
23 effusion/empyema, asthma, and 'other.' If the clinical team recorded multiple diagnoses from  
24  
25 the list above, they were classified using the following rules:  
26  
27  
28

- 29  
30 1. Subjects marked as having both viral infection and pneumonia were classified as having  
31  
32 'pneumonia' if the chest radiograph was read by the radiologist as consistent with  
33  
34 pneumonia and as 'viral infection' (without pneumonia) if not.  
35  
36
- 37  
38 2. Subjects marked as having both asthma and pneumonia were classified as having  
39  
40 'pneumonia' if the chest radiograph was read by the radiologist as consistent with  
41  
42 pneumonia and as 'asthma' if not.  
43  
44
- 45  
46 3. Subjects marked as having both viral infection and asthma were classified as having  
47  
48 'asthma' if they were older than 1 y of age and had a history of atopy; if not, they were  
49  
50 classified as 'viral infection.'  
51  
52  
53

### 54 55 **Laboratory testing**

1  
2  
3 All children hospitalized with a potentially infectious respiratory illness at MCH have an NPS  
4 performed routinely to identify respiratory viruses, as per the institutional Acute Respiratory  
5 Infection Surveillance Protocol. NPSs are assayed using a lab-developed multiplex respiratory  
6 virus panel (11) that detects RSV A/B, human metapneumovirus, influenza A/B, parainfluenza I-  
7 III, adenovirus, and rhinovirus/enterovirus. NPS specimens from eligible subjects were  
8 identified and stored. After the surveillance period, NPSs from subjects were batch-tested (ie.  
9 test results were not available to treating clinicians) using an Hamilton Regional Laboratory  
10 Medicine Program lab-developed multiplex PCR assay to detect *M. pneumoniae* and *Chlamydia*  
11 *pneumoniae* that was validated against sequencing and external quality control materials.  
12  
13  
14  
15  
16  
17  
18  
19  
20  
21  
22  
23  
24  
25  
26  
27

28 Any MP testing ordered prospectively by treating clinicians in the course of routine care was  
29 not processed using the lab-developed PCR assay but at Public Health Ontario Laboratories  
30 using a commercial multiplex real-time assay (ProPneumo-1 Assay; Gen-Probe Inc., San Diego,  
31 CA, USA), which also tests for *Chlamydia pneumoniae*. Samples that tested positive for MP  
32 underwent further testing at Public Health Ontario laboratories; nested PCR amplification and  
33 DNA sequencing of domain V of the partial 23S rRNA gene were performed to detect mutations  
34 at nucleotide positions 2063 and 2064, which are associated with macrolide resistance (12,13).  
35  
36  
37  
38  
39  
40  
41  
42  
43  
44  
45  
46

47 'Confirmed invasive bacterial infections' were defined as those children with a sterile-site  
48 culture (ie. blood, pleural fluid) positive for a recognized pathogen. Cultures positive for  
49 coagulase-negative staphylococci were categorized as contaminants.  
50  
51  
52  
53  
54  
55  
56  
57  
58  
59  
60

## Statistical analysis

Descriptive statistics to describe the baseline characteristics were reported as count (percent) for categorical variables, and mean (standard deviation) or median (first quartile-third quartile, labeled as interquartile range [IQR]) for continuous variables depending on the distribution. Normality was assessed visually. T-tests or linear regression were used to compare normally-distributed continuous variables. Kruskal-Wallis testing was used when the distribution of the variable differed greatly from the normal distribution. If Kruskal-Wallis testing identified significant differences, nonparametric pairwise multiple comparisons of the groups using Dunn's test with Bonferroni adjustment were done. Chi-square or Fisher exact testing was used to compare categorical variables between groups. Alpha was set at 0.05, with no adjustments for multiple comparisons in this exploratory study. No imputation of missing data was done. Analyses were conducted using Stata v11.2 (College Station, TX).

## RESULTS

In the study period there were 740 children admitted to the PICU; of these, 221 subjects (31%) had a diagnosis of acute respiratory illness, an NPS taken less than a week after admission, and at least one respiratory tract symptom or sign (Table 1). The median age was 3.1 y (IQR 1.4-6.0 y) and 44% were female. The majority of subjects (78%) had comorbidities (see Table 1). There were 13 subjects (6%) that had a tracheostomy, 7 (3%) that were receiving home ventilation, 6 (3%) that were receiving home non-invasive ventilation, and 9 (4%) on home oxygen therapy. There were three deaths (1.3%) in the cohort and all had comorbidities. Fourteen subjects (6%) were not up-to-date with DPTaP-Hib or PCV13 vaccine.

1  
2  
3 In the PICU, the majority of subjects (n=139, 63%) received high-flow oxygen support, 49 (22%)  
4 received CPAP/BiPAP, 38 (17%) required conventional mechanical ventilation, and 1 (0.45%)  
5 were treated with high-frequency oscillatory ventilation (see Table 2). Viral detections were  
6 common, with 79 (36%) subjects positive for rhinovirus/enterovirus, 37 (17%) positive for RSV,  
7 and 24 (11%) positive for parainfluenza; only 72 (33%) tested negative for respiratory viruses  
8 (see Table 3). There were 7 subjects with confirmed invasive bacterial infections. The median  
9 length of stay in the PICU was 3 days (IQR 2-5 d) and the medial length of stay in-hospital was 4  
10 days (IQR 3-8 d).  
11  
12  
13  
14  
15  
16  
17  
18  
19  
20  
21  
22  
23

24  
25 Of the 221 subjects, 50 (23%) were categorized as having had viral infection without  
26 pneumonia, 81 (37%) as uncomplicated pneumonia, 12 (5.4%) as pneumonia complicated by  
27 effusion/empyema, 63 (29%) as an asthma exacerbation, and 15 (6.8%) as 'other.' There was  
28 considerable overlap in the white blood cell (WBC) distributions between categories (see Table;  
29 4). C-reactive protein measurements were clearly different between groups; those with  
30 pneumonia (median 45.5 mg/L) had significantly higher median CRP values than those in the  
31 viral infection (median 12.6 mg/L) and asthma (median 7.0 mg/L) groups, whereas those with  
32 pneumonia complicated by effusion/empyema (median CRP 203.8 mg/L) had significantly  
33 higher CRP values than all other groups. There were clear differences in the proportions of  
34 subjects in each group with respect to viral NPS testing; 90% of the viral infection group and  
35 72% of the asthma group had a respiratory virus detected, while only 60% of the uncomplicated  
36 pneumonia group and 25% of the complicated pneumonia group did ( $p < 0.0001$ ). All of the  
37 subjects in the uncomplicated and complicated pneumonia groups were treated with  
38  
39  
40  
41  
42  
43  
44  
45  
46  
47  
48  
49  
50  
51  
52  
53  
54  
55  
56  
57  
58  
59  
60



1  
2  
3 antibiotics, compared to 93% of the 'other' group, 74% of the viral-infection group, and 35% of  
4  
5 the asthma group ( $p<0.0001$ ). The duration of antibacterial treatment was also significantly  
6  
7 shorter in the viral infection and asthma groups than all other groups ( $p<0.0001$ ), as well as  
8  
9 significantly longer in the complicated pneumonia group than in the uncomplicated pneumonia  
10  
11 group ( $p=0.02$ ).  
12  
13  
14  
15  
16  
17

18 There were 3 subjects who tested positive, of 10 who had specimens tested, for *M.*  
19  
20 *pneumoniae* through testing that was ordered prospectively by clinicians in the course of  
21  
22 routine care (one sputum, one NPS, and one bronchoalveolar lavage [BAL]). There were an  
23  
24 additional 7 subjects that were found to have an NPS positive for *M. pneumoniae* via  
25  
26 retrospective study testing. The overall prevalence of *M. pneumoniae*-associated respiratory  
27  
28 illness in the study cohort was therefore 10/221 (4.5%, 95%CI 2.2-8.2%). *Mycoplasma*-positive  
29  
30 subjects were significantly older than *Mycoplasma*-negative children (difference 3.5 y, 95% CI  
31  
32 0.66-6.4 y,  $p=0.02$ )(Table 4). The overall prevalence of *Mycoplasma* infection in subjects aged >  
33  
34 5 years with any type of pneumonia was 13.2% (4 of 33 in the uncomplicated pneumonia group  
35  
36 and 1 of 5 in the complicated pneumonia group, 95% CI 4.4-28%). In this older subset, there  
37  
38 were zero *Mycoplasma*-positive subjects in the viral infection or asthma groups.  
39  
40  
41  
42  
43  
44  
45  
46

47 None of the *Mycoplasma*-positive group had invasive bacterial infections. Three (30%) of the  
48  
49 *Mycoplasma*-positive group had a respiratory viral pathogen detected as compared to 146  
50  
51 (69%) of the *Mycoplasma*-negative group ( $p=0.02$ , see Table 5). Antimicrobials were prescribed  
52  
53 for significantly longer from the time of admission in the *Mycoplasma*-positives (median 11  
54  
55  
56  
57  
58  
59  
60

1  
2  
3 days, IQR 7-17 d) as compared to the *Mycoplasma*- negatives (median 5 d, IQR 0-8 d,  $p=0.02$ );  
4  
5 this difference remained significant when the analysis was restricted to only those subjects with  
6  
7 uncomplicated pneumonia (median 12 d as compared to median 7 d,  $p=0.004$ ).  
8  
9

10  
11  
12 Of the 10 *Mycoplasma* isolates, 5 were macrolide-sensitive and 1 harboured the G2063  
13  
14 mutation in the 23S rRNA gene (overall prevalence 17%, 95%CI 0.4-64%); 3 isolates were low-  
15  
16 level positives, and so could not be sequenced. One isolate was not retained. Only half of the  
17  
18 subjects with *Mycoplasma* infection were prescribed macrolide or fluoroquinolone  
19  
20  
21  
22  
23 antibacterials.  
24  
25  
26  
27

28 No study subjects had *Chlamydia pneumoniae* detected in their NPS.  
29  
30  
31

## 32 **DISCUSSION**

33  
34  
35 In this retrospective single-centre study, we found that 4.5% of all children with acute  
36  
37 respiratory illness admitted to the PICU, the majority of whom had comorbidities, had *M.*  
38  
39 *pneumoniae* detected in respiratory specimens. More importantly, 13.2% (95%CI 4.4-28%) of  
40  
41 children diagnosed with pneumonia who were at least 5 years of age were positive for *M.*  
42  
43 *pneumoniae*. Children that were *Mycoplasma*-positive were older, had fewer respiratory virus  
44  
45 co-infections, were more often treated with antibacterials before admission, and received a  
46  
47 longer course of antibacterials in-hospital than *Mycoplasma*-negative children. Half of the  
48  
49  
50  
51  
52 *Mycoplasma*-positive children did not receive antibacterials active against *Mycoplasma*. One of  
53  
54 the six *Mycoplasma* isolates that could be sequenced harboured a macrolide resistance gene.  
55  
56  
57  
58  
59  
60

1  
2  
3  
4  
5  
6 Our results would argue that routine surveillance for this pathogen should be considered, as  
7  
8 others have suggested (14), although infection was more rare in infants or preschool-aged  
9  
10 children. Our results are consistent with the findings of the EPIC study, which also  
11  
12 demonstrated that *M. pneumoniae* is found commonly in school-aged children with CAP (2),  
13  
14 including children admitted to the intensive care unit (10). A recent retrospective cohort study  
15  
16 of all children admitted to two PICUs in Australia over a 6-year period revealed 30 cases  
17  
18 identified by testing done as part of routine clinical care among 3005 “nonelective infection-  
19  
20 related admissions”, for a prevalence of ~1% (15). Those authors stated “*M. pneumoniae*  
21  
22 infections in critically ill children are uncommon” and noted that outcomes were comparable to  
23  
24 those children without *Mycoplasma* detected. However, there is considerable variability in  
25  
26 what constitutes an “infection-related admission” (15); furthermore, given the range of  
27  
28 presenting symptoms/signs associated with this pathogen (10,16,17), one questions whether  
29  
30 these clinicians would have been able to reliably identify which children merited testing, and so  
31  
32 the true prevalence of *Mycoplasma* infection in this cohort could be much higher. The  
33  
34 incidence of *M. pneumoniae* infection does vary widely by location and season (10,18) and so  
35  
36 we cannot exclude the possibility that the prevalence observed in our study was higher than in  
37  
38 years before or after.  
39  
40  
41  
42  
43  
44  
45  
46  
47  
48  
49

50 An older iteration of the Canadian Paediatric Society guidelines for the management of CAP  
51  
52 (circa 2011) recommended routine use of azithromycin for all children with ‘severe’ pneumonia  
53  
54 because of the possibility of ‘atypical infection’, though diagnostic testing to identify atypical  
55  
56  
57  
58  
59  
60

1  
2  
3 pathogens was not suggested or even mentioned (19). One might question whether this  
4  
5 practice would represent appropriate antimicrobial stewardship, given that the majority of  
6  
7 severe pediatric CAP is likely to be caused by *S. pneumoniae*. The CPS guidelines were later  
8  
9 revised in 2015 and no longer recommend routine treatment with macrolides (8). They state  
10  
11 that atypical pneumonia should be suspected in children with 'subacute, nonsevere  
12  
13 pneumonia, presenting with features such as prominent cough, minimal leukocytosis, and a  
14  
15 nonlobar infiltrate' and that azithromycin is recommended 'for suspected or proven  
16  
17 *Mycoplasma* or *Chlamydia pneumoniae*' (8). Unfortunately, it has been repeatedly  
18  
19 demonstrated that these symptoms and signs cannot reliably identify atypical pneumonia  
20  
21 (10,16,17); it seems likely that many clinicians may not consider the possibility that *M.*  
22  
23 *pneumoniae* may play a significant role in the pathogenesis of critically ill children with  
24  
25 respiratory compromise. Based on our data, we would suggest that clinicians be aware that a  
26  
27 reasonable proportion of school-aged children with CAP admitted to the PICU may have an  
28  
29 active *M. pneumoniae* infection and recommend empiric treatment with anti-*Mycoplasma*  
30  
31 agents (eg. macrolides, doxycycline, fluoroquinolones) until diagnostic (molecular) testing  
32  
33 results are available.  
34  
35  
36  
37  
38  
39  
40  
41  
42  
43  
44

45 There were obvious limitations to our study. As noted previously, this was a retrospective  
46  
47 design and included only a single centre over a 13-month period; as outbreaks with this  
48  
49 pathogen have been frequently described (20), we cannot be certain that the prevalence of  
50  
51 infection documented in this study is an accurate estimate of children hospitalized with critical  
52  
53 respiratory illness in our region of Canada. It is also quite possible that hospital clinicians may  
54  
55  
56  
57  
58  
59  
60

1  
2  
3 not have strictly followed hospital infection control policy and failed to sample the  
4  
5 nasopharynges of some patients who otherwise would have been eligible. The study cohort  
6  
7 only comprised 221 children and there were only 10 found to be positive for *M. pneumoniae*;  
8  
9 consequently, 95% confidence intervals around our point estimates are wide. Having said that,  
10  
11 the prevalence of *Mycoplasma* infection found in this small study was similar to that found in a  
12  
13 much larger study conducted recently in the United States (2).  
14  
15  
16  
17  
18  
19

20 One obvious issue is that we cannot be certain of the therapeutic benefit of antibacterials (such  
21  
22 as macrolides or doxycycline) for pediatric CAP presumed to be caused at least in part by *M.*  
23  
24 *pneumoniae*; one systematic review found no clear difference in outcomes between children  
25  
26 treated with *Mycoplasma*-active agents and those without (21). Furthermore, the detection of  
27  
28 *Mycoplasma* in the respiratory tract does not prove causation, as coinfections have been shown  
29  
30 to be common (10) and some investigators have documented high rates of PCR-positivity in  
31  
32 control persons (22) (although others have not (10,23)); some investigators have identified  
33  
34 novel serologic tests that can confirm active infection (24). We would agree with other authors  
35  
36 who have suggested that specific anti-*Mycoplasma* treatment might yield significant benefit,  
37  
38 especially for those with severe disease, and have called for the execution of a randomized  
39  
40 treatment trial (10,14). However, until results of a definitive treatment trial are available, we  
41  
42 feel that the potential benefit of treating critically ill children with *Mycoplasma* detected in  
43  
44 respiratory symptoms outweighs the potential antimicrobial stewardship harms of this strategy.  
45  
46  
47  
48  
49  
50  
51  
52  
53  
54  
55  
56  
57  
58  
59  
60

1  
2  
3 In conclusion, we found that *Mycoplasma pneumoniae* was detected in 12.5% of children aged  
4  
5 5 years and older admitted with CAP to the PICU of a children's hospital over a 13-month  
6  
7 period. Consideration should be given to empiric anti-*Mycoplasma* antimicrobial therapy  
8  
9 pending the result of rapid molecular diagnostic testing in this subset of critically ill children.  
10  
11  
12  
13  
14

#### 15 Contributorship Statement

16  
17 HA designed the study, wrote the protocol, did the chart reviews, wrote the abstract, and  
18  
19 revised the manuscript critically. JMP conceived the study question, provided input on study  
20  
21 design, performed statistical analyses, and wrote the manuscript. KL and MS provided input on  
22  
23 microbiologic methods, revised the protocol, did testing to identify *M. pneumoniae*, and revised  
24  
25 the manuscript critically. AE and JBG provided input on microbiologic methods, did testing to  
26  
27 identify resistance genes, and revised the manuscript critically.  
28  
29  
30  
31  
32  
33  
34  
35  
36  
37  
38  
39  
40  
41  
42  
43  
44  
45  
46  
47  
48  
49  
50  
51  
52  
53  
54  
55  
56  
57  
58  
59  
60

## References

1. Lee GE, Lorch SA, Sheffler-Collins S, *et al.* National hospitalization trends for pediatric pneumonia and associated complications. *Pediatrics* **2010**; 126: 204-213
2. Jain S, Williams DJ, Arnold SR, *et al.* Community-acquired pneumonia requiring hospitalization among U.S. Children. *N Engl J Med* **2015**; 372: 835-845
3. Koh J, Wong JJ, Sultana R, *et al.* Risk factors for mortality in children with pneumonia admitted to the pediatric intensive care unit. *Pediatr Pulmonol* **2017**; 52: 1076-1084
4. Principi N & Esposito S. Emerging problems in the treatment of pediatric community-acquired pneumonia. *Expert Rev Respir Med* **2018**; 12: 595-603
5. Ouldali N, Levy C, Minodier P, *et al.* Long-term association of 13-valent pneumococcal conjugate vaccine implementation with rates of community-acquired pneumonia in children. *JAMA Pediatr* **2019**; 173: 362-370
6. Bradley JS, Arguedas A, Blumer JL, *et al.* Comparative study of levofloxacin in the treatment of children with community-acquired pneumonia. *Pediatr Infect Dis J* **2007**; 26: 868-878
7. Harris M, Clark J, Coote N, *et al.* British thoracic society guidelines for the management of community acquired pneumonia in children: Update 2011. *Thorax* **2011**; 66 Suppl 2: ii1-23
8. Le Saux N, Robinson JL, Canadian Paediatric Society ID, *et al.* Uncomplicated pneumonia in healthy Canadian children and youth: Practice points for management. *Paediatr Child Health* **2015**; 20: 441-450
9. Bradley JS, Byington CL, Shah SS, *et al.* The management of community-acquired pneumonia in infants and children older than 3 months of age: Clinical practice guidelines by the PIDS and IDSA. *Clin Infect Dis* **2011**; 53: e25-76
10. Kutty PK, Jain S, Taylor TH, *et al.* *Mycoplasma pneumoniae* among children hospitalized with community-acquired pneumonia. *Clin Infect Dis* **2019**; 68: 5-12
11. Ali M, Han S, Gunst CJ, *et al.* Throat and nasal swabs for molecular detection of respiratory viruses in acute pharyngitis. *Virol J* **2015**; 12: 178
12. Matsuoka M, Narita M, Okazaki N, *et al.* Characterization and molecular analysis of macrolide-resistant *Mycoplasma pneumoniae* clinical isolates obtained in Japan. *Antimicrob Agents Chemother* **2004**; 48: 4624-4630
13. Eshghi A, Memari N, Tang P, *et al.* Macrolide-resistant *Mycoplasma pneumoniae* in humans, Ontario, Canada, 2010-2011. *Emerg Infect Dis* **2013**; 19
14. Shah SS. *Mycoplasma pneumoniae* as a cause of community-acquired pneumonia in children. *Clin Infect Dis* **2019**; 68: 13-14
15. Moynihan KM, Barlow A, Nourse C, *et al.* Severe *Mycoplasma pneumoniae* infection in children admitted to pediatric intensive care. *Pediatr Infect Dis J* **2018**; 37: e336-e338
16. Meyer Sauter PM, Unger WWJ, van Rossum AMC, *et al.* The art and science of diagnosing *Mycoplasma pneumoniae* infection. *Pediatr Infect Dis J* **2018**; 37: 1192-1195
17. Guo WL, Wang J, Zhu LY, *et al.* Differentiation between *Mycoplasma* and viral community-acquired pneumonia in children with lobe or multi foci infiltration: A retrospective case study. *BMJ Open* **2015**; 5: e006766

18. Jacobs E, Ehrhardt I & Dumke R. New insights in the outbreak pattern of mycoplasma pneumoniae. *Int J Med Microbiol* **2015**; 305: 705-708
19. Le Saux N, Robinson JL. Pneumonia in healthy Canadian children and youth: Practice points for management. *Pediatr Child Health* **2011**; 16: 417-420
20. Waites KB & Talkington DF. Mycoplasma pneumoniae and its role as a human pathogen. *Clin Microbiol Rev* **2004**; 17: 697-728, table of contents
21. Biondi E, McCulloh R, Alverson B, *et al.* Treatment of Mycoplasma pneumoniae: A systematic review. *Pediatrics* **2014**; 133: 1081-1090
22. Spuesens EB, Fraaij PL, Visser EG, *et al.* Carriage of Mycoplasma pneumoniae in the upper respiratory tract of symptomatic and asymptomatic children: An observational study. *PLoS Med* **2013**; 10: e1001444
23. Nilsson AC, Bjorkman P & Persson K. Polymerase chain reaction is superior to serology for the diagnosis of acute Mycoplasma pneumoniae infection and reveals a high rate of persistent infection. *BMC Microbiol* **2008**; 8: 93
24. Meyer Sauter PM, Seiler M, Truck J, *et al.* Diagnosis of Mycoplasma pneumoniae pneumonia with measurement of specific antibody-secreting cells. *Am J Respir Crit Care Med* **2019**; 200: 1066-1069



Table 1. Whole-cohort baseline characteristics.

|                                                           |                        |
|-----------------------------------------------------------|------------------------|
| Median age (IQR)                                          | 3.11 y (1.39 – 6.02 y) |
| Age                                                       |                        |
| < 1 y                                                     | 36 (16%)               |
| 1-2 y                                                     | 45 (20%)               |
| 2-5 y                                                     | 63 (29%)               |
| 5-10 y                                                    | 45 (20%)               |
| 10-15 y                                                   | 32 (14%)               |
| # Female (%)                                              | 96 (44%)               |
| Fever recorded (%)                                        | 120 (55%)              |
| Median duration of fever (IQR)                            | 3 d (2 – 6 d)          |
| Symptoms                                                  |                        |
| Cough                                                     | 191 (87%)              |
| Increased work of breathing                               | 202 (91%)              |
| Stridor                                                   | 13 (5.9%)              |
| Wheeze                                                    | 112 (51%)              |
| Chest pain                                                | 4 (1.8%)               |
| Antibiotics given before presentation?                    |                        |
| Yes                                                       | 44 (20%)               |
| Amoxicillin                                               | 18                     |
| Amoxicillin/clavulanate                                   | 2                      |
| Cephalosporins                                            | 10                     |
| Macrolides                                                | 10                     |
| Other                                                     | 11                     |
| Comorbid medical conditions                               | 174 (78%)              |
| neurologic/neurodevelopmental                             | 52                     |
| tracheostomy                                              | 13                     |
| other lung disease (including bronchopulmonary dysplasia) | 36                     |
| asthma                                                    | 89                     |
| cystic fibrosis                                           | 1                      |
| genetic disease                                           | 26                     |
| cardiac disease                                           | 26                     |
| chronic liver disease                                     | 1                      |
| chronic kidney disease                                    | 7                      |
| endocrine disorders                                       | 13                     |
| malignancy                                                | 3                      |
| immunodeficiency/immunosuppressant drugs                  | 5                      |
| haemoglobinopathies                                       | 5                      |
| other                                                     | 27                     |
| Home ventilation/oxygenation                              | 16 (7%)                |
| Mechanical ventilation                                    | 7                      |
| Noninvasive ventilation                                   | 6                      |
| Oxygen therapy without ventilation                        | 3                      |

|                                                    |           |
|----------------------------------------------------|-----------|
| Highest level of respiratory support given in PICU |           |
| High frequency oscillatory ventilation             | 1 (0.45%) |
| Conventional mechanical ventilation                | 37 (17%)  |
| BiPAP/CPAP                                         | 34 (15%)  |
| High flow oxygen by nasal cannula                  | 96 (43%)  |
| Low flow oxygen (FiO <sub>2</sub> > 0.4)           | 10 (4.4%) |
| Antibiotics given in PICU                          |           |
| ampicillin                                         | 14        |
| ceftriaxone                                        | 149       |
| piperacillin-tazobactam                            | 12        |
| carbapenems                                        | 3         |
| vancomycin                                         | 29        |
| clindamycin                                        | 25        |
| clarithromycin                                     | 3         |
| azithromycin                                       | 35        |
| levofloxacin                                       | 11        |
| tetracyclines                                      | 0         |

Table 2. Whole-cohort clinical course in the PICU

|                                                    |             |
|----------------------------------------------------|-------------|
| Median length of stay in PICU (IQR)                | 3 d (2-5 d) |
| Highest level of respiratory support given in PICU |             |
| High frequency oscillatory ventilation             | 1 (0.45%)   |
| Conventional mechanical ventilation                | 37 (17%)    |
| BiPAP/CPAP                                         | 34 (15%)    |
| High flow oxygen by nasal cannula                  | 96 (43%)    |
| Low flow oxygen (FiO <sub>2</sub> > 0.4)           | 10 (4.4%)   |
| Antibiotics given in PICU                          |             |
| ampicillin                                         | 14          |
| ceftriaxone                                        | 149         |
| piperacillin-tazobactam                            | 12          |
| carbapenems                                        | 3           |
| vancomycin                                         | 29          |
| clindamycin                                        | 25          |
| clarithromycin                                     | 3           |
| azithromycin                                       | 35          |
| levofloxacin                                       | 11          |
| tetracyclines                                      | 0           |

Table 3. Whole-cohort microbiology

|                 |          |
|-----------------|----------|
| Mucosal testing |          |
| RSV             | 37 (17%) |
| Influenza       | 6 (3%)   |
| Metapneumovirus | 7 (3%)   |

|                                 |          |
|---------------------------------|----------|
| Adenovirus                      | 5 (2%)   |
| Parainfluenza                   | 24 (11%) |
| Rhino/enterovirus               | 79 (36%) |
| <i>Mycoplasma</i>               | 10 (5%)  |
| Pleural fluid testing           |          |
| group A Streptococcus           | 2        |
| <i>Streptococcus anginosus</i>  | 1        |
| Blood culture testing           |          |
| <i>Streptococcus pneumoniae</i> | 1        |
| <i>Haemophilus influenzae</i>   | 1        |
| <i>Escherichia coli</i>         | 1        |
| <i>Enterococcus faecalis</i>    | 1        |

Table 4. Differences between diagnostic categories.

|                                            | Viral infection      | Asthma               | Pneumonia (uncomplicated/undifferentiated) | Pneumonia (complicated by effusion) | Other            |
|--------------------------------------------|----------------------|----------------------|--------------------------------------------|-------------------------------------|------------------|
| Count (%)                                  | 50 (22%)             | 63 (29%)             | 81 (37%)                                   | 12 (5.4%)                           | 15 (6.8%)        |
| mean WBC (SD)                              | 12.1 (4.3)           | 13.6 (5.0)           | 13.0 (8.1)                                 | 19.0 <sup>1</sup> (11.0)            | 12.8 (7.5)       |
| missing                                    | 1                    | 1                    | 1                                          | 0                                   | 0                |
| median CRP, mg/L (IQR)                     | 12.6 (3.5-28.6)      | 7.0 (3.6-16.4)       | 45.5 <sup>2</sup> (15.2-103)               | 203.8 <sup>3</sup> (146.8-274.7)    | 23.6 (14.6-80.2) |
| missing                                    | 28                   | 47                   | 31                                         | 4                                   | 2                |
| No respiratory virus detected              | 5 (10%)              | 18 (29%)             | 32 (40%)                                   | 9 (75%)                             | 8 (53%)          |
| missing                                    | 0                    | 0                    | 0                                          | 0                                   | 0                |
| median duration of antibiotics, days (IQR) | 2 <sup>4</sup> (0-4) | 0 <sup>4</sup> (0-1) | 7 (7-10)                                   | 23 <sup>5</sup> (14-27)             | 10 (7-14)        |
| missing                                    | 0                    | 0                    | 0                                          | 0                                   | 0                |

<sup>1</sup>mean of complicated pneumonia group significantly greater than the others (p=0.002).

<sup>2</sup>median of pneumonia group significantly greater than that of viral infection group (p=0.007) and asthma group (p=0.0009) but significantly lower than that of complicated pneumonia group (p=0.02)

<sup>3</sup>median of complicated pneumonia group significantly greater than viral infection and asthma groups (p<0.0001) and pneumonia group (p=0.009)

<sup>4</sup>median of viral infection and asthma groups significantly smaller than all other groups (p<0.0001)

<sup>5</sup>median of complicated pneumonia group also significantly higher than pneumonia group (p=0.02)

Table 5. Comparison of *Mycoplasma*-positive and *Mycoplasma*-negative subjects.

|                                                       | <i>Mycoplasma</i> -positive | <i>Mycoplasma</i> -negative | p     |
|-------------------------------------------------------|-----------------------------|-----------------------------|-------|
| Count                                                 | 10                          | 211                         | n/a   |
| age, years                                            |                             |                             | 0.02  |
| mean (SD)                                             | 8.1 (6.1)                   | 4.6 (4.4)                   |       |
| median (IQR)                                          | 7.2 (2.0 – 16)              | 3.0 (1.3 – 6.0)             |       |
| % greater than 5 y                                    | 60%                         | 34%                         |       |
| # with viral infection or asthma diagnosis (%)        | 3 (30%)                     | 110 (51%)                   | 0.2   |
| (restricted to subjects > 5 y)                        | 0                           | 30 (42%)                    | 0.08  |
| # with no detectable respiratory virus in NPS         | 7 (70%)                     | 65 (31%)                    | 0.02  |
| (restricted to subjects > 5 y)                        | 5 (83%)                     | 33 (46%)                    | 0.1   |
| median duration of antibiotic treatment, d (IQR)      | 11 (7-17)                   | 5 (0-8)                     | 0.02  |
| (restricted to subjects with uncomplicated pneumonia) | 12 (10-13)                  | 7 (7-10)                    | 0.004 |
| Median length of stay in PICU, d (IQR)                | 4.5 (2-8)                   | 3 (2-5)                     | 0.1   |
| (restricted to subjects with uncomplicated pneumonia) | 7 (2-8)                     | 4 (2-7)                     | 0.7   |
| Median length of stay in hospital, d (IQR)            | 10 (5-13)                   | 4 (3-8)                     | 0.03  |
| (restricted to subjects with uncomplicated pneumonia) | 13 (7-14)                   | 7 (3-14)                    | 0.3   |

# BMJ Paediatrics Open

## **Pediatric critical illness associated with respiratory infection: a single-centre, retrospective, cohort study**

|                               |                                                                                                                                                                                                                                                                                                                                                                                                                                                                                |
|-------------------------------|--------------------------------------------------------------------------------------------------------------------------------------------------------------------------------------------------------------------------------------------------------------------------------------------------------------------------------------------------------------------------------------------------------------------------------------------------------------------------------|
| Journal:                      | <i>BMJ Paediatrics Open</i>                                                                                                                                                                                                                                                                                                                                                                                                                                                    |
| Manuscript ID                 | bmjpo-2020-000640.R2                                                                                                                                                                                                                                                                                                                                                                                                                                                           |
| Article Type:                 | Original research                                                                                                                                                                                                                                                                                                                                                                                                                                                              |
| Date Submitted by the Author: | 30-Mar-2020                                                                                                                                                                                                                                                                                                                                                                                                                                                                    |
| Complete List of Authors:     | Alfaraidi, Haifa; McMaster University, Department of Pediatrics<br>Luinstra, Kathy; Saint Joseph's Healthcare Hamilton Charlton Campus, Laboratory Medicine<br>Eshaghi, Alireza; Public Health Ontario Laboratory Services<br>Smieja, Marek; McMaster University, Department of Pathology and Molecular Medicine<br>Gubbay, Jonathan; Public Health Ontario Laboratory Services<br>Pernica, Jeffrey; McMaster University, Department of Pediatrics - RINGGOLD INSTITUTION 3710 |
| Keywords:                     | Infectious Diseases, Epidemiology                                                                                                                                                                                                                                                                                                                                                                                                                                              |
|                               |                                                                                                                                                                                                                                                                                                                                                                                                                                                                                |

SCHOLARONE™  
Manuscripts



I, the Submitting Author has the right to grant and does grant on behalf of all authors of the Work (as defined in the below author licence), an exclusive licence and/or a non-exclusive licence for contributions from authors who are: i) UK Crown employees; ii) where BMJ has agreed a CC-BY licence shall apply, and/or iii) in accordance with the terms applicable for US Federal Government officers or employees acting as part of their official duties; on a worldwide, perpetual, irrevocable, royalty-free basis to BMJ Publishing Group Ltd ("BMJ") its licensees and where the relevant Journal is co-owned by BMJ to the co-owners of the Journal, to publish the Work in this journal and any other BMJ products and to exploit all rights, as set out in our [licence](#).

The Submitting Author accepts and understands that any supply made under these terms is made by BMJ to the Submitting Author unless you are acting as an employee on behalf of your employer or a postgraduate student of an affiliated institution which is paying any applicable article publishing charge ("APC") for Open Access articles. Where the Submitting Author wishes to make the Work available on an Open Access basis (and intends to pay the relevant APC), the terms of reuse of such Open Access shall be governed by a Creative Commons licence – details of these licences and which [Creative Commons](#) licence will apply to this Work are set out in our licence referred to above.

Other than as permitted in any relevant BMJ Author's Self Archiving Policies, I confirm this Work has not been accepted for publication elsewhere, is not being considered for publication elsewhere and does not duplicate material already published. I confirm all authors consent to publication of this Work and authorise the granting of this licence.

1  
2  
3 **Pediatric critical illness associated with respiratory infection: a single-centre, retrospective,**  
4 **cohort study**  
5

6  
7 Haifa Alfaraidi, MBBS, Department of Pediatrics, McMaster University, Hamilton, Ontario,  
8 Canada  
9

10  
11 Kathy Luinstra, Department of Laboratory Medicine, St. Joseph's Healthcare Hamilton, Ontario,  
12 Canada  
13

14  
15 AliReza Eshaghi, PhD. Public Health Ontario Laboratory, Public Health Ontario, Toronto,  
16 Ontario, Canada.  
17

18  
19 Marek Smieja, MD PhD, Department of Pathology and Molecular Medicine, McMaster  
20 University  
21

22  
23 Jonathan B. Gubbay, MBBS, Public Health Ontario Laboratory, Public Health Ontario, Toronto,  
24 Ontario, Canada. Department of Laboratory Medicine and Pathobiology and Department of  
25 Pediatrics, University of Toronto, Toronto, Ontario, Canada.  
26

27  
28 Jeffrey M. Pernica, MD, Division of Infectious Disease, Department of Pediatrics, McMaster  
29 University  
30

31 Corresponding author:

32 Jeffrey M. Pernica, 1280 Main St. West, Hamilton, ON, Canada, L8S 4K1

33 p: (905) 521 2100 extension 76185

34 f: (905) 308 7548

35 email: [pernica@mcmaster.ca](mailto:pernica@mcmaster.ca)  
36

37  
38 Word count : 2974  
39

40  
41 Keywords: pneumonia, intensive care, respiratory tract infection, epidemiology, Mycoplasma  
42

43  
44 Short title: Pediatric critical respiratory illness: a retrospective study  
45

46  
47 Funding: This project was supported by a McMaster University Department of Pediatrics  
48 Resident Research Grant. JMP was supported by a Hamilton Health Sciences Early Career  
49 Award. There are no conflicts of interest.  
50

51  
52 Presentation: Poster presentation, Association of Medical Microbiology and Infectious Disease  
53 Canada annual conference, 2018.  
54

55  
56 Acknowledgements: The authors would like to acknowledge the assistance of Samir Patel who  
57 oversaw the Mycoplasma resistance testing.  
58  
59  
60

## Abstract

**Objectives.** To describe critically ill children with respiratory infections, classify them by infection syndrome type, and determine the prevalence of *Mycoplasma pneumoniae* detection.

**Study design.** A retrospective, single-centre, cohort study. All children aged 2 months – 18 years with presumed respiratory infection who were admitted to a tertiary hospital paediatric intensive care unit between September 2015-October 2016 were eligible. Subjects were grouped by clinical syndrome (viral respiratory infection, asthma exacerbation, undifferentiated/uncomplicated pneumonia, pneumonia complicated by effusion/empyema, and 'other'). All subjects had nasopharyngeal swabs tested for respiratory viruses, *Mycoplasma pneumoniae*, and *Chlamydia pneumoniae*.

**Results.** There were 221 subjects; the median age was 3.1 y, 44% were female, and 78% had medical comorbidities. A majority (75%) was treated with antibiotics, most often ceftriaxone (90% of treated children). Those with any pneumonia were significantly less likely to have a respiratory virus identified in their nasopharynxes and had significantly higher C-reactive protein (CRP) values than those in the viral infection and asthma groups. There were 10 subjects in whom *M. pneumoniae* was detected (4.5%, 95%CI 2.2-8.2%). *Mycoplasma*-positive children were older (difference 3.5 y, 95%CI 0.66 – 6.4 y) and had fewer viral co-infections (30% compared to 69%,  $p=0.02$ ). The prevalence of *Mycoplasma* infection in children aged > 5 y with any pneumonia was 13.2% (95%CI 4.4-28%).

**Conclusions.** The majority of participants had respiratory viruses detected and were treated with broad-spectrum antibiotics. Differences in CRP and viral prevalence were observed between children with different infection syndrome types. *M. pneumoniae* infection was not rare in school-aged children with pneumonia admitted to the PICU. Attention to antibiotic treatment and rapid diagnostic testing for *Mycoplasma* in older, critically ill children should be considered to optimize management and avert morbidity and mortality from respiratory infection.

### What is known about this topic?

Respiratory viruses and *Mycoplasma pneumoniae* are commonly detected in children with non-severe pneumonia.

Guidelines for the management of community-acquired pneumonia in children do not advocate first-line empiric treatment with antibiotics active against *Mycoplasma* nor routine testing for this pathogen.

### What this study adds:

There are clear biochemical (eg. CRP) and microbiologic (eg. respiratory virus prevalence) differences between critically ill children with different respiratory infection syndromes.



1  
2  
3  
4 Respiratory viruses were detected in 67% of the entire study cohort and *Mycoplasma*  
5 *pneumoniae* was detected in 13.2% of school-aged critically ill children with severe community-  
6 acquired pneumonia.  
7  
8  
9  
10  
11  
12  
13  
14  
15  
16  
17  
18  
19  
20  
21  
22  
23  
24  
25  
26  
27  
28  
29  
30  
31  
32  
33  
34  
35  
36  
37  
38  
39  
40  
41  
42  
43  
44  
45  
46  
47  
48  
49  
50  
51  
52  
53  
54  
55  
56  
57  
58  
59  
60

Confidential: For Review Only

## BACKGROUND

Community-acquired pneumonia (CAP) is a leading cause of pediatric hospitalization in North America (1). Children with respiratory disease severe enough to warrant admission to a paediatric intensive care unit (PICU) represent a minority (~20%) of pneumonia-related hospitalizations (2) but infection-related morbidity and mortality is higher in this subgroup (3).

*Streptococcus pneumoniae* has long been considered the most important bacterial pathogen causing severe CAP (4,5). *Mycoplasma pneumoniae*, in contrast, is thought of as a less virulent pathogen, possibly due to the fact that *M. pneumoniae* infection often self-resolves (6). Neither the American, Canadian, nor British guidelines recommend antimicrobials with activity against *M. pneumoniae* as first-line empiric treatment for pediatric CAP (7-9). However, this pathogen is a common cause of CAP, especially in school-aged children; *M. pneumoniae* was the most commonly identified bacterial pathogen in American children hospitalized with CAP, being detected in 8% of the overall cohort and in 19% of school-aged children (2). A subsequent analysis of this data demonstrated that the children with *M. pneumoniae* infection could not be distinguished reliably on a clinical basis from those without and that, in contrast to dogma (8,9), single lobar infiltrates and pleural effusions were common on chest radiography (32% and 26% of those infected, respectively) (10). Furthermore, 12% of those with *M. pneumoniae* infection required intensive care (10). Clearly, the epidemiology of this common respiratory pathogen – and its effect on the clinical course and prognosis for children with severe CAP – should be evaluated further. The objective of our study was to describe children admitted to the PICU of

1  
2  
3 McMaster Children's Hospital (MCH) with respiratory infection and determine the prevalence  
4  
5 of *M. pneumoniae* detection in this population.  
6  
7  
8  
9

## 10 **METHODS**

### 11 **Setting**

12  
13  
14  
15  
16 MCH is a tertiary care centre serving a population of approximately 2.3 million residents. At the  
17  
18 time of the study, the centre had 159 beds (12 PICU beds) and, on a yearly basis, admitted  
19  
20 approximately 6500 children, with over 40 000 emergency department visits.  
21  
22  
23  
24  
25  
26

### 27 **Design**

28  
29  
30 A single center, retrospective cohort study. Eligible children were those aged 2 months to 18  
31  
32 years admitted to the MCH PICU from September 2015 to October 2016 with a presumptive  
33  
34 respiratory infection, as defined by a discharge diagnosis of any lower respiratory tract  
35  
36 infection. Discharge diagnoses for all patients leaving the PICU were reviewed on a biweekly  
37  
38 basis by an investigator (HA); we attempted to capture all those with possible respiratory  
39  
40 infection, to minimize bias. Children aged less than two months were not included due to the  
41  
42 different epidemiology of respiratory infection in that age group. Furthermore, all eligible  
43  
44 subjects had to have had a nasopharyngeal swab (NPS) taken less than a week after admission  
45  
46 to hospital and a respiratory symptom or sign, including at least one of the following: 1)  
47  
48 tachypnoea as per age-specific norms (35); 2) cough; 3) increased work of breathing on exam,  
49  
50 or 4) auscultatory findings such as crackles, wheeze, or rhonchi. The study was approved by the  
51  
52  
53  
54  
55  
56  
57  
58  
59  
60

Hamilton Integrated Research Ethics Board, who waived the requirement for consent in this retrospective study. Patients or the public were not involved in study design. No formal sample size calculation was done.

### Data collection

Information was obtained by retrospective chart review using a standardized data collection form. To group study subjects by infection syndrome, the discharge diagnoses of the clinical team were categorized as follows: viral infection without pneumonia (including bronchiolitis and croup), undifferentiated/uncomplicated pneumonia, pneumonia complicated by effusion/empyema, asthma, and 'other.' If the clinical team recorded multiple diagnoses from the list above, they were classified using the following rules:

1. Subjects marked as having both viral infection and pneumonia were classified as having 'pneumonia' if the chest radiograph was read by the radiologist as consistent with pneumonia and as 'viral infection' (without pneumonia) if not.
2. Subjects marked as having both asthma and pneumonia were classified as having 'pneumonia' if the chest radiograph was read by the radiologist as consistent with pneumonia and as 'asthma' if not.
3. Subjects marked as having both viral infection and asthma were classified as having 'asthma' if they were older than 1 y of age and had a history of atopy; if not, they were classified as 'viral infection.'

### Laboratory testing

1  
2  
3 All children hospitalized with a potentially infectious respiratory illness at MCH have an NPS  
4 performed routinely to identify respiratory viruses, as per the institutional Acute Respiratory  
5 Infection Surveillance Protocol. NPSs are assayed using a lab-developed multiplex respiratory  
6 virus panel (11) that detects respiratory syncytial virus (RSV) A/B, human metapneumovirus,  
7 influenza A/B, parainfluenza I-III, adenovirus, and rhinovirus/enterovirus. NPS specimens from  
8 eligible subjects were identified and stored. After the surveillance period, NPSs from subjects  
9 were batch-tested (ie. test results were not available to treating clinicians) using an Hamilton  
10 Regional Laboratory Medicine Program lab-developed multiplex PCR assay to detect *M.*  
11 *pneumoniae* and *Chlamydia pneumoniae* that was validated against sequencing and external  
12 quality control materials.  
13  
14  
15  
16  
17  
18  
19  
20  
21  
22  
23  
24  
25  
26  
27  
28  
29

30 Any MP testing ordered prospectively by treating clinicians in the course of routine care was  
31 not processed using the lab-developed PCR assay but at Public Health Ontario Laboratories  
32 using a commercial multiplex real-time assay (ProPneumo-1 Assay; Gen-Probe Inc., San Diego,  
33 CA, USA), which also tests for *Chlamydia pneumoniae*. Samples that tested positive for MP  
34 underwent further testing at Public Health Ontario laboratories; nested PCR amplification and  
35 DNA sequencing of domain V of the partial 23S rRNA gene were performed to detect mutations  
36 at nucleotide positions 2063 and 2064, which are associated with macrolide resistance (12,13).  
37  
38  
39  
40  
41  
42  
43  
44  
45  
46  
47  
48  
49

50 'Confirmed invasive bacterial infections' were defined as those children with a sterile-site  
51 culture (ie. blood, pleural fluid) positive for a recognized pathogen. Cultures positive for  
52 coagulase-negative staphylococci were categorized as contaminants.  
53  
54  
55  
56  
57  
58  
59  
60

## Statistical analysis

Descriptive statistics to describe the baseline characteristics were reported as count (percent) for categorical variables, and mean (standard deviation) or median (first quartile-third quartile, labeled as interquartile range [IQR]) for continuous variables depending on the distribution.

Normality was assessed visually. T-tests or linear regression were used to compare normally-distributed continuous variables. Kruskal-Wallis testing was used when the distribution of the variable differed greatly from the normal distribution. If Kruskal-Wallis testing identified significant differences, nonparametric pairwise multiple comparisons of the groups using Dunn's test with Bonferroni adjustment were done. Chi-square or Fisher exact testing was used to compare categorical variables between groups. Alpha was set at 0.05, with no adjustments for multiple comparisons in this exploratory study. No imputation of missing data was done.

Analyses were conducted using Stata v11.2 (College Station, TX).

## RESULTS

In the study period there were 740 children admitted to the PICU; of these, 221 subjects (31%) had a diagnosis of acute respiratory illness, an NPS taken less than a week after admission, and at least one respiratory tract symptom or sign (Table 1). The median age was 3.1 y (IQR 1.4-6.0 y) and 44% were female. The majority of subjects (78%) had comorbidities (see Table 1). There were 13 subjects (6%) that had a tracheostomy, 7 (3%) that were receiving home ventilation, 6 (3%) that were receiving home non-invasive ventilation, and 9 (4%) on home oxygen therapy.

1  
2  
3 There were three deaths (1.3%) in the cohort and all had comorbidities. Fourteen subjects (6%)  
4  
5 were not up-to-date with DPTaP-Hib or PCV13 vaccine.  
6  
7

8  
9  
10 In the PICU, the majority of subjects (n=139, 63%) received high-flow oxygen support, 49 (22%)  
11  
12 received CPAP/BiPAP, 38 (17%) required conventional mechanical ventilation, and 1 (0.45%)  
13  
14 were treated with high-frequency oscillatory ventilation (see Table 2). Viral detections were  
15  
16 common, with 79 (36%) subjects positive for rhinovirus/enterovirus, 37 (17%) positive for RSV,  
17  
18 and 24 (11%) positive for parainfluenza; only 72 (33%) tested negative for respiratory viruses  
19  
20 (see Table 3). There were 7 subjects with confirmed invasive bacterial infections. The median  
21  
22 length of stay in the PICU was 3 days (IQR 2-5 d) and the medial length of stay in-hospital was 4  
23  
24 days (IQR 3-8 d).  
25  
26  
27  
28  
29

30  
31  
32 Of the 221 subjects, 50 (23%) were categorized as having had viral infection without  
33  
34 pneumonia, 81 (37%) as uncomplicated pneumonia, 12 (5.4%) as pneumonia complicated by  
35  
36 effusion/empyema, 63 (29%) as an asthma exacerbation, and 15 (6.8%) as 'other.' There was  
37  
38 considerable overlap in the white blood cell (WBC) distributions between categories (see Table  
39  
40 4). C-reactive protein measurements were clearly different between groups; those with  
41  
42 pneumonia (median 45.5 mg/L) had significantly higher median CRP values than those in the  
43  
44 viral infection (median 12.6 mg/L) and asthma (median 7.0 mg/L) groups, whereas those with  
45  
46 pneumonia complicated by effusion/empyema (median CRP 203.8 mg/L) had significantly  
47  
48 higher CRP values than all other groups. There were clear differences in the proportions of  
49  
50 subjects in each group with respect to viral NPS testing; 90% of the viral infection group and  
51  
52  
53  
54  
55  
56  
57  
58  
59  
60

1  
2  
3 72% of the asthma group had a respiratory virus detected, while only 60% of the uncomplicated  
4 pneumonia group and 25% of the complicated pneumonia group did ( $p<0.0001$ ). All of the  
5 subjects in the uncomplicated and complicated pneumonia groups were treated with  
6 antibiotics, compared to 93% of the 'other' group, 74% of the viral-infection group, and 35% of  
7 the asthma group ( $p<0.0001$ ). The duration of antibacterial treatment was also significantly  
8 shorter in the viral infection and asthma groups than all other groups ( $p<0.0001$ ), as well as  
9 significantly longer in the complicated pneumonia group than in the uncomplicated pneumonia  
10 group ( $p=0.02$ ).  
11  
12  
13  
14  
15  
16  
17  
18  
19  
20  
21  
22  
23  
24

25 There were 3 subjects who tested positive, of 10 who had specimens tested, for *M.*  
26 *pneumoniae* through testing that was ordered prospectively by clinicians in the course of  
27 routine care (one sputum, one NPS, and one bronchoalveolar lavage [BAL]). There were an  
28 additional 7 subjects that were found to have an NPS positive for *M. pneumoniae* via  
29 retrospective study testing. The overall prevalence of *M. pneumoniae*-associated respiratory  
30 illness in the study cohort was therefore 10/221 (4.5%, 95%CI 2.2-8.2%). *Mycoplasma*-positive  
31 subjects were significantly older than *Mycoplasma*-negative children (difference 3.5 y, 95% CI  
32 0.66-6.4 y,  $p=0.02$ )(Table 4). The overall prevalence of *Mycoplasma* detection in subjects aged >  
33 5 years with any type of pneumonia was 13.2% (4 of 33 in the uncomplicated pneumonia group  
34 and 1 of 5 in the complicated pneumonia group, 95% CI 4.4-28%). In this older subset, there  
35 were zero *Mycoplasma*-positive subjects in the viral infection or asthma groups.  
36  
37  
38  
39  
40  
41  
42  
43  
44  
45  
46  
47  
48  
49  
50  
51  
52  
53  
54  
55  
56  
57  
58  
59  
60



1  
2  
3 None of the *Mycoplasma*-positive group had invasive bacterial infections. Three (30%) of the  
4  
5  
6 *Mycoplasma*-positive group had a respiratory viral pathogen detected as compared to 146  
7  
8 (69%) of the *Mycoplasma*-negative group ( $p=0.02$ , see Table 5). Antimicrobials were prescribed  
9  
10 for significantly longer from the time of admission in the *Mycoplasma*-positives (median 11  
11  
12 days, IQR 7-17 d) as compared to the *Mycoplasma*- negatives (median 5 d, IQR 0-8 d,  $p=0.02$ );  
13  
14 this difference remained significant when the analysis was restricted to only those subjects with  
15  
16 uncomplicated pneumonia (median 12 d as compared to median 7 d,  $p=0.004$ ).  
17  
18  
19  
20  
21  
22

23 Of the 10 *Mycoplasma* isolates, 5 were macrolide-sensitive and 1 harboured the G2063  
24  
25 mutation in the 23S rRNA gene (overall prevalence 17%, 95%CI 0.4-64%); 3 isolates were low-  
26  
27 level positives, and so could not be sequenced. One isolate was not retained. Only half of the  
28  
29 subjects with *Mycoplasma* infection were prescribed macrolide or fluoroquinolone  
30  
31 antibacterials.  
32  
33  
34  
35  
36  
37

38 No study subjects had *Chlamydia pneumoniae* detected in their NPS.  
39  
40  
41

## 42 DISCUSSION

43  
44 In this retrospective single-centre study, we found that children with acute respiratory illness  
45  
46 admitted to the PICU were predominantly preschool-aged, often had medical comorbidities,  
47  
48 and frequently had viral pathogens detected in their nasopharynges. A minority had *M.*  
49  
50 *pneumoniae* detected in respiratory secretions and even fewer had documented invasive  
51  
52 bacterial infections. Despite this, 75% of the cohort was treated with antibacterials, most  
53  
54  
55  
56  
57  
58  
59  
60

1  
2  
3 commonly ceftriaxone (90% of treated children). Children diagnosed with asthma or viral  
4  
5 infections were found to differ microbiologically (more viral pathogens detected) and  
6  
7 biochemically (lower CRP values) from children diagnosed with pneumonia. Interestingly, 13.2%  
8  
9 (95%CI 4.4-28%) of children diagnosed with pneumonia who were at least 5 years of age were  
10  
11 positive for *M. pneumoniae*. Children that were *Mycoplasma*-positive were older, had fewer  
12  
13 respiratory virus co-infections, were more often treated with antibacterials before admission,  
14  
15 and received a longer course of antibacterials in-hospital than *Mycoplasma*-negative children.  
16  
17  
18 Half of the *Mycoplasma*-positive children did not receive antibacterials active against  
19  
20  
21  
22  
23 *Mycoplasma*.

24  
25  
26  
27 The fact that respiratory viruses were frequently detected in critically ill paediatric patients with  
28  
29 respiratory illness is not surprising, given the epidemiology of respiratory infection in children.  
30  
31  
32 Respiratory viruses have been long known to be important causes of paediatric pulmonary  
33  
34 disease; for example, it has been estimated that there are at least 50 000 RSV-associated  
35  
36 hospitalizations per year in the United States, with more than a quarter requiring intensive care  
37  
38 (14). One large recent cohort study enrolling over two thousand children hospitalized for  
39  
40 pneumonia (21% of whom required PICU admission) at three American hospitals detected  
41  
42 respiratory viral pathogens in 73% (2). Viral coinfections may be even more common in children  
43  
44 with critical illness, given that paediatric patients with bacterial pneumonia with confirmed viral  
45  
46 coinfection have been found to have worse outcomes than those without (15).  
47  
48  
49  
50  
51  
52  
53  
54  
55  
56  
57  
58  
59  
60

1  
2  
3 It is unfortunate that almost three-quarters of all patients thought to have a purely viral  
4  
5 syndrome received treatment with antibacterials. Needless to say, neither the Canadian,  
6  
7 American, nor British guidelines recommend antibiotic treatment for viral lower respiratory  
8  
9 tract infections (16-18). Furthermore, the vast majority of treated patients received ceftriaxone,  
10  
11 which would be appropriate for some children with pneumonia (eg. immunocompromised  
12  
13 patients) but not for others (eg. group A streptococcal empyema). It is difficult to make  
14  
15 definitive statements about appropriateness given that we did not examine the precise  
16  
17 sequence of antibiotic administration in each patient in relation to the timing of microbiologic  
18  
19 results. However, the fact that the vast majority of CAP in children is caused by pneumococcus  
20  
21 or group A streptococcus, coupled with the observation that only 14 children (6%) received  
22  
23 ampicillin, is very suggestive that antimicrobial stewardship was sub-optimal in the PICU during  
24  
25 the study period.  
26  
27  
28  
29  
30  
31  
32  
33  
34

35 Our results would argue that routine surveillance for *Mycoplasma* in school-aged children  
36  
37 should be considered, as others have suggested (19). Our findings are consistent with other  
38  
39 studies that demonstrated that *M. pneumoniae* is found commonly in school-aged children with  
40  
41 CAP (2), including children admitted to the intensive care unit (10). The incidence of *M.*  
42  
43 *pneumoniae* infection does vary widely by location and season (10,20) and so we cannot  
44  
45 exclude the possibility that the prevalence observed in our study was higher than in years  
46  
47 before or after. An older iteration of the Canadian Paediatric Society guidelines for the  
48  
49 management of CAP (circa 2011) recommended routine use of azithromycin for all children  
50  
51 with 'severe' pneumonia because of the possibility of 'atypical infection', though diagnostic  
52  
53  
54  
55  
56  
57  
58  
59  
60

1  
2  
3 testing to identify atypical pathogens was not suggested or even mentioned (21). One might  
4  
5 question whether this practice would represent appropriate antimicrobial stewardship, given  
6  
7 that the majority of severe pediatric CAP is likely to be caused by *S. pneumoniae*. The CPS  
8  
9 guidelines were later revised in 2015 and no longer recommend routine treatment with  
10  
11 macrolides (8). They state that atypical pneumonia should be suspected in children with  
12  
13 'subacute, nonsevere pneumonia, presenting with features such as prominent cough, minimal  
14  
15 leukocytosis, and a nonlobar infiltrate' and that azithromycin is recommended 'for suspected or  
16  
17 proven *Mycoplasma* or *Chlamydia pneumoniae*' (8). Unfortunately, it has been repeatedly  
18  
19 demonstrated that these symptoms and signs cannot reliably identify atypical pneumonia  
20  
21 (10,22,23); it seems likely that many clinicians may not consider the possibility that *M.*  
22  
23 *pneumoniae* may play a significant role in the pathogenesis of critically ill children with  
24  
25 respiratory compromise. Based on our data, we would suggest that clinicians be aware that a  
26  
27 reasonable proportion of school-aged children with CAP admitted to the PICU may have an  
28  
29 active *M. pneumoniae* infection and recommend empiric treatment with anti-*Mycoplasma*  
30  
31 agents (eg. macrolides, doxycycline, fluoroquinolones) until diagnostic (molecular) testing  
32  
33 results are available. Of course, we cannot be certain of the therapeutic benefit of  
34  
35 antibacterials targeting *M. pneumoniae*; one systematic review found no clear difference in  
36  
37 outcomes between children treated with *Mycoplasma*-active agents and those without (24).  
38  
39 Furthermore, the detection of *Mycoplasma* in the respiratory tract does not prove causation, as  
40  
41 coinfections have been shown to be common (10) and some investigators have documented  
42  
43 high rates of PCR-positivity in control persons (25) (although others have not (10,26)); some  
44  
45 investigators have identified novel serologic tests that can confirm active infection (27). We  
46  
47  
48  
49  
50  
51  
52  
53  
54  
55  
56  
57  
58  
59  
60

1  
2  
3 would agree with other authors who have suggested that specific anti-*Mycoplasma* treatment  
4 might yield significant benefit, especially for those with severe disease, and have called for the  
5 execution of a randomized treatment trial (10,19). However, until results of a definitive  
6 treatment trial are available, we feel that the potential benefit of treating critically ill children  
7 with *Mycoplasma* detected in respiratory symptoms outweighs the potential antimicrobial  
8 stewardship harms of this strategy.  
9  
10  
11  
12  
13  
14  
15  
16  
17  
18  
19

20 There were obvious limitations to our study. As noted previously, this was a retrospective  
21 design and included only a single centre over a 13-month period; as outbreaks with this  
22 pathogen have been frequently described (28), we cannot be certain that the prevalence of  
23 infection documented in this study is an accurate estimate of children hospitalized with critical  
24 respiratory illness in our region of Canada. It is also quite possible that hospital clinicians may  
25 not have strictly followed hospital infection control policy and failed to sample the  
26 nasopharynges of some patients who otherwise would have been eligible. The study cohort  
27 only comprised 221 children and there were only 10 found to be positive for *M. pneumoniae*;  
28 consequently, 95% confidence intervals around our point estimates are wide. Having said that,  
29 the prevalence of viral and *Mycoplasma* detection found in this small study was similar to other  
30 estimates (2).  
31  
32  
33  
34  
35  
36  
37  
38  
39  
40  
41  
42  
43  
44  
45  
46  
47  
48  
49

50 In conclusion, we found that the majority of children admitted to the PICU with respiratory  
51 illness over a 13-month period were positive for respiratory viruses and potentially  
52 inappropriate antibiotic treatment was common. *Mycoplasma pneumoniae* was detected in  
53  
54  
55  
56  
57  
58  
59  
60

1  
2  
3 13.2% of children aged 5 years and older diagnosed with CAP. Effort should be made to  
4  
5 distinguish those with plausible bacterial infections from those without and consideration  
6  
7 should be given to empiric anti-*Mycoplasma* antimicrobial therapy pending the result of rapid  
8  
9 molecular diagnostic testing in a subset of critically ill children.  
10  
11  
12  
13  
14

#### 15 Contributorship Statement

16  
17 HA designed the study, wrote the protocol, did the chart reviews, wrote the abstract, and  
18  
19 revised the manuscript critically. JMP conceived the study question, provided input on study  
20  
21 design, performed statistical analyses, and wrote the manuscript. KL and MS provided input on  
22  
23 microbiologic methods, revised the protocol, did testing to identify *M. pneumoniae*, and revised  
24  
25 the manuscript critically. AE and JBG provided input on microbiologic methods, did testing to  
26  
27 identify resistance genes, and revised the manuscript critically.  
28  
29  
30  
31  
32  
33  
34  
35  
36  
37  
38  
39  
40  
41  
42  
43  
44  
45  
46  
47  
48  
49  
50  
51  
52  
53  
54  
55  
56  
57  
58  
59  
60

## References

1. Lee GE, Lorch SA, Sheffler-Collins S, *et al.* National hospitalization trends for pediatric pneumonia and associated complications. *Pediatrics* **2010**; 126: 204-213
2. Jain S, Williams DJ, Arnold SR, *et al.* Community-acquired pneumonia requiring hospitalization among U.S. Children. *N Engl J Med* **2015**; 372: 835-845
3. Koh J, Wong JJ, Sultana R, *et al.* Risk factors for mortality in children with pneumonia admitted to the pediatric intensive care unit. *Pediatr Pulmonol* **2017**; 52: 1076-1084
4. Principi N & Esposito S. Emerging problems in the treatment of pediatric community-acquired pneumonia. *Expert Rev Respir Med* **2018**; 12: 595-603
5. Ouldali N, Levy C, Minodier P, *et al.* Long-term association of 13-valent pneumococcal conjugate vaccine implementation with rates of community-acquired pneumonia in children. *JAMA Pediatr* **2019**; 173: 362-370
6. Bradley JS, Arguedas A, Blumer JL, *et al.* Comparative study of levofloxacin in the treatment of children with community-acquired pneumonia. *Pediatr Infect Dis J* **2007**; 26: 868-878
7. Harris M, Clark J, Coote N, *et al.* British Thoracic Society guidelines for the management of community acquired pneumonia in children: Update 2011. *Thorax* **2011**; 66 Suppl 2: ii1-23
8. Le Saux N, Robinson JL, Canadian Paediatric Society ID, *et al.* Uncomplicated pneumonia in healthy Canadian children and youth: Practice points for management. *Paediatr Child Health* **2015**; 20: 441-450
9. Bradley JS, Byington CL, Shah SS, *et al.* The management of community-acquired pneumonia in infants and children older than 3 months of age: Clinical practice guidelines by the PIDS and IDSA. *Clin Infect Dis* **2011**; 53: e25-76
10. Kutty PK, Jain S, Taylor TH, *et al.* *Mycoplasma pneumoniae* among children hospitalized with community-acquired pneumonia. *Clin Infect Dis* **2019**; 68: 5-12
11. Ali M, Han S, Gunst CJ, *et al.* Throat and nasal swabs for molecular detection of respiratory viruses in acute pharyngitis. *Virol J* **2015**; 12: 178
12. Matsuoka M, Narita M, Okazaki N, *et al.* Characterization and molecular analysis of macrolide-resistant *Mycoplasma pneumoniae* clinical isolates obtained in Japan. *Antimicrob Agents Chemother* **2004**; 48: 4624-4630
13. Eshaghi A, Memari N, Tang P, *et al.* Macrolide-resistant *Mycoplasma pneumoniae* in humans, Ontario, Canada, 2010-2011. *Emerg Infect Dis* **2013**; 19
14. Arriola CS, Kim L, Langley G, *et al.* Estimated burden of community-onset respiratory syncytial virus-associated hospitalizations among children aged <2 years in the United States, 2014-15. *J Pediatric Infect Dis Soc* **2019**;
15. Nolan VG, Arnold SR, Bramley AM, *et al.* Etiology and impact of coinfections in children hospitalized with community-acquired pneumonia. *J Infect Dis* **2018**; 218: 179-188
16. Friedman JN, Rieder MJ, Walton JM, *et al.* Bronchiolitis: Recommendations for diagnosis, monitoring and management of children one to 24 months of age. *Paediatr Child Health* **2014**; 19: 485-498
17. Ralston SL, Lieberthal AS, Meissner HC, *et al.* Clinical practice guideline: The diagnosis, management, and prevention of bronchiolitis. *Pediatrics* **2014**; 134: e1474-1502

18. National Institute for Health and Care Excellence. "Bronchiolitis in children: Diagnosis and management" <https://www.nice.org.uk/guidance/ng9/resources/bronchiolitis-in-children-diagnosis-and-management-pdf-51048523717>. Last Accessed 2020 March 29
19. Shah SS. Mycoplasma pneumoniae as a cause of community-acquired pneumonia in children. *Clin Infect Dis* **2019**; 68: 13-14
20. Jacobs E, Ehrhardt I & Dumke R. New insights in the outbreak pattern of Mycoplasma pneumoniae. *Int J Med Microbiol* **2015**; 305: 705-708
21. Le Saux N, Robinson JL. Pneumonia in healthy Canadian children and youth: Practice points for management. *Pediatr Child Health* **2011**; 16: 417-420
22. Meyer Sauter PM, Unger WWJ, van Rossum AMC, *et al.* The art and science of diagnosing Mycoplasma pneumoniae infection. *Pediatr Infect Dis J* **2018**; 37: 1192-1195
23. Guo WL, Wang J, Zhu LY, *et al.* Differentiation between Mycoplasma and viral community-acquired pneumonia in children with lobe or multi foci infiltration: A retrospective case study. *BMJ Open* **2015**; 5: e006766
24. Biondi E, McCulloh R, Alverson B, *et al.* Treatment of Mycoplasma pneumonia: A systematic review. *Pediatrics* **2014**; 133: 1081-1090
25. Spuesens EB, Fraaij PL, Visser EG, *et al.* Carriage of Mycoplasma pneumoniae in the upper respiratory tract of symptomatic and asymptomatic children: An observational study. *PLoS Med* **2013**; 10: e1001444
26. Nilsson AC, Bjorkman P & Persson K. Polymerase chain reaction is superior to serology for the diagnosis of acute Mycoplasma pneumoniae infection and reveals a high rate of persistent infection. *BMC Microbiol* **2008**; 8: 93
27. Meyer Sauter PM, Seiler M, Truck J, *et al.* Diagnosis of Mycoplasma pneumoniae pneumonia with measurement of specific antibody-secreting cells. *Am J Respir Crit Care Med* **2019**; 200: 1066-1069
28. Waites KB & Talkington DF. Mycoplasma pneumoniae and its role as a human pathogen. *Clin Microbiol Rev* **2004**; 17: 697-728, table of contents



Table 1. Whole-cohort baseline characteristics.

|                                                           |                        |
|-----------------------------------------------------------|------------------------|
| Median age (IQR)                                          | 3.11 y (1.39 – 6.02 y) |
| Age                                                       |                        |
| < 1 y                                                     | 36 (16%)               |
| 1-2 y                                                     | 45 (20%)               |
| 2-5 y                                                     | 63 (29%)               |
| 5-10 y                                                    | 45 (20%)               |
| 10-15 y                                                   | 32 (14%)               |
| # Female (%)                                              | 96 (44%)               |
| Fever recorded (%)                                        | 120 (55%)              |
| Median duration of fever (IQR)                            | 3 d (2 – 6 d)          |
| Symptoms                                                  |                        |
| Increased work of breathing                               | 202 (91%)              |
| Cough                                                     | 191 (87%)              |
| Wheeze                                                    | 112 (51%)              |
| Stridor                                                   | 13 (5.9%)              |
| Chest pain                                                | 4 (1.8%)               |
| Antibiotics given before presentation?                    |                        |
| Yes                                                       | 44 (20%)               |
| Amoxicillin                                               | 18                     |
| Amoxicillin/clavulanate                                   | 2                      |
| Cephalosporins                                            | 10                     |
| Macrolides                                                | 10                     |
| Other                                                     | 11                     |
| Comorbid medical conditions                               | 174 (78%)              |
| asthma                                                    | 89                     |
| other lung disease (including bronchopulmonary dysplasia) | 36                     |
| neurologic/neurodevelopmental                             | 52                     |
| genetic disease                                           | 26                     |
| cardiac disease                                           | 26                     |
| endocrine disorders                                       | 13                     |
| tracheostomy                                              | 13                     |
| chronic kidney disease                                    | 7                      |
| immunodeficiency/immunosuppressant drugs                  | 5                      |
| haemoglobinopathies                                       | 5                      |
| malignancy                                                | 3                      |
| chronic liver disease                                     | 1                      |
| other                                                     | 27                     |
| Home ventilation/oxygenation                              | 16 (7%)                |
| Mechanical ventilation                                    | 7                      |
| Noninvasive ventilation                                   | 6                      |
| Oxygen therapy without ventilation                        | 3                      |
| Antibiotics given in PICU                                 | 166 (75%)              |

|                         |     |
|-------------------------|-----|
| ampicillin              | 14  |
| ceftriaxone             | 149 |
| piperacillin-tazobactam | 12  |
| carbapenems             | 3   |
| vancomycin              | 29  |
| clindamycin             | 25  |
| clarithromycin          | 3   |
| azithromycin            | 35  |
| levofloxacin            | 11  |
| tetracyclines           | 0   |

Table 2. Whole-cohort clinical course in the PICU

|                                                    |             |
|----------------------------------------------------|-------------|
| Median length of stay in PICU (IQR)                | 3 d (2-5 d) |
| Highest level of respiratory support given in PICU |             |
| High frequency oscillatory ventilation             | 1 (0.45%)   |
| Conventional mechanical ventilation                | 37 (17%)    |
| BiPAP/CPAP                                         | 34 (15%)    |
| High flow oxygen by nasal cannula                  | 96 (43%)    |
| Low flow oxygen (FiO <sub>2</sub> > 0.4)           | 10 (4.4%)   |
| Antibiotics given in PICU                          | 166 (75%)   |
| ceftriaxone                                        | 149         |
| azithromycin                                       | 35          |
| vancomycin                                         | 29          |
| clindamycin                                        | 25          |
| ampicillin                                         | 14          |
| piperacillin-tazobactam                            | 12          |
| levofloxacin                                       | 11          |
| carbapenems                                        | 3           |
| clarithromycin                                     | 3           |

Table 3. Whole-cohort microbiology

|                                |                       |
|--------------------------------|-----------------------|
| Mucosal testing                | positive in 156 (71%) |
| Rhino/enterovirus              | 79 (36%)              |
| RSV                            | 37 (17%)              |
| Parainfluenza                  | 24 (11%)              |
| <i>Mycoplasma</i>              | 10 (5%)               |
| Metapneumovirus                | 7 (3%)                |
| Influenza                      | 6 (3%)                |
| Adenovirus                     | 5 (2%)                |
| Pleural fluid testing          |                       |
| group A Streptococcus          | 2                     |
| <i>Streptococcus anginosus</i> | 1                     |
| Blood culture testing          |                       |

|                                 |   |
|---------------------------------|---|
| <i>Streptococcus pneumoniae</i> | 1 |
| <i>Haemophilus influenzae</i>   | 1 |
| <i>Escherichia coli</i>         | 1 |
| <i>Enterococcus faecalis</i>    | 1 |

Table 4. Differences between diagnostic categories.

|                                            | Viral infection      | Asthma               | Pneumonia (uncomplicated/undifferentiated) | Pneumonia (complicated by effusion) | Other            |
|--------------------------------------------|----------------------|----------------------|--------------------------------------------|-------------------------------------|------------------|
| Count (%)                                  | 50 (22%)             | 63 (29%)             | 81 (37%)                                   | 12 (5.4%)                           | 15 (6.8%)        |
| mean WBC (SD)                              | 12.1 (4.3)           | 13.6 (5.0)           | 13.0 (8.1)                                 | 19.0 <sup>1</sup> (11.0)            | 12.8 (7.5)       |
| missing                                    | 1                    | 1                    | 1                                          | 0                                   | 0                |
| median CRP, mg/L (IQR)                     | 12.6 (3.5-28.6)      | 7.0 (3.6-16.4)       | 45.5 <sup>2</sup> (15.2-103)               | 203.8 <sup>3</sup> (146.8-274.7)    | 23.6 (14.6-80.2) |
| missing                                    | 28                   | 47                   | 31                                         | 4                                   | 2                |
| No respiratory virus detected              | 5 (10%)              | 18 (29%)             | 32 (40%)                                   | 9 (75%)                             | 8 (53%)          |
| missing                                    | 0                    | 0                    | 0                                          | 0                                   | 0                |
| median duration of antibiotics, days (IQR) | 2 <sup>4</sup> (0-4) | 0 <sup>4</sup> (0-1) | 7 (7-10)                                   | 23 <sup>5</sup> (14-27)             | 10 (7-14)        |
| missing                                    | 0                    | 0                    | 0                                          | 0                                   | 0                |

<sup>1</sup>mean of complicated pneumonia group significantly greater than the others (p=0.002).

<sup>2</sup>median of pneumonia group significantly greater than that of viral infection group (p=0.007) and asthma group (p=0.0009) but significantly lower than that of complicated pneumonia group (p=0.02)

<sup>3</sup>median of complicated pneumonia group significantly greater than viral infection and asthma groups (p<0.0001) and pneumonia group (p=0.009)

<sup>4</sup>median of viral infection and asthma groups significantly smaller than all other groups (p<0.0001)

<sup>5</sup>median of complicated pneumonia group also significantly higher than pneumonia group (p=0.02)

Table 5. Comparison of *Mycoplasma*-positive and *Mycoplasma*-negative subjects.

|                    | <i>Mycoplasma</i> -positive | <i>Mycoplasma</i> -negative | p    |
|--------------------|-----------------------------|-----------------------------|------|
| Count              | 10                          | 211                         | n/a  |
| age, years         |                             |                             | 0.02 |
| mean (SD)          | 8.1 (6.1)                   | 4.6 (4.4)                   |      |
| median (IQR)       | 7.2 (2.0 – 16)              | 3.0 (1.3 – 6.0)             |      |
| % greater than 5 y | 60%                         | 34%                         |      |

|                                                       |            |           |       |
|-------------------------------------------------------|------------|-----------|-------|
| # with viral infection or asthma diagnosis (%)        | 3 (30%)    | 110 (51%) | 0.2   |
| (restricted to subjects > 5 y)                        | 0          | 30 (42%)  | 0.08  |
| # with no detectable respiratory virus in NPS         | 7 (70%)    | 65 (31%)  | 0.02  |
| (restricted to subjects > 5 y)                        | 5 (83%)    | 33 (46%)  | 0.1   |
| median duration of antibiotic treatment, d (IQR)      | 11 (7-17)  | 5 (0-8)   | 0.02  |
| (restricted to subjects with uncomplicated pneumonia) | 12 (10-13) | 7 (7-10)  | 0.004 |
| Median length of stay in PICU, d (IQR)                | 4.5 (2-8)  | 3 (2-5)   | 0.1   |
| (restricted to subjects with uncomplicated pneumonia) | 7 (2-8)    | 4 (2-7)   | 0.7   |
| Median length of stay in hospital, d (IQR)            | 10 (5-13)  | 4 (3-8)   | 0.03  |
| (restricted to subjects with uncomplicated pneumonia) | 13 (7-14)  | 7 (3-14)  | 0.3   |
